# Supplementary material for: Dipyridinophane ligands – synthesis and coordination study
Source: Royal Society of Chemistry journal article supplement (doi:10.1039/d6ra00469e), 2026-04-07
Supplement: d6ra00469e1.pdf [file d6ra00469e1.pdf]

## Supplementary information

### Dipyridinophane ligands – synthesis and coordination study

Lucie Kuncová, Jana Lazarová, Jan Kotek, Vojtěch Kubíček,\* Petr Hermann

Department of Inorganic Chemistry, Faculty of Science, Charles University in Prague, Hlavova  
2030, 128 40 Prague (Czech Republic), E-mail: [kubicek@natur.cuni.cz](mailto:kubicek@natur.cuni.cz)

#### Table of contents

##### Synthesis of the studied ligands

**2,6-bis(bromomethyl)pyridine (1)**

**2,6-bis(aminomethyl)pyridine (4)**

**2,6-bis{[(4-methylphenyl)sulfonamido]methyl}pyridine (2)**

##### NMR spectra of the studied ligands

**Figure S1.** The  $^1\text{H}$  and  $^{13}\text{C}\{^1\text{H}\}$  NMR spectra of **dpph**.

**Figure S2.** The  $^1\text{H}$  and  $^{13}\text{C}\{^1\text{H}\}$  NMR spectra of **H<sub>2</sub>dppa**.

**Figure S3.** The  $^1\text{H}$ - $^{13}\text{C}$  HSQC and HMBC NMR spectra of **H<sub>2</sub>dppa**.

**Figure S4.** The  $^1\text{H}$  and  $^{13}\text{C}\{^1\text{H}\}$  NMR spectra of **H<sub>4</sub>dppp**.

**Figure S5.** The  $^{31}\text{P}$  NMR spectra of **H<sub>4</sub>dppp**.

**Figure S6.** The  $^1\text{H}$ - $^{13}\text{C}$  HSQC and HMBC NMR spectra of **H<sub>4</sub>dppp**.

##### Mass Spectra (ESI)

**Figure S7.** Mass spectrum of **compound 3**

**Figure S8.** Mass spectrum of **dpph**

**Figure S9.** Mass spectrum of **H<sub>2</sub>dppa**

**Figure S10.** Mass spectrum of **H<sub>4</sub>dppp**

**Figure S11.** Mass spectrum of **[Ni(dpp)Cl<sub>2</sub>]**

**Figure S12.** Mass spectrum of **[Cu(dpp)Cl<sub>2</sub>]**

**Figure S13.** Mass spectrum of **[Zn(dpp)Cl<sub>2</sub>]**

**Figure S14.** Mass spectrum of **[Fe(dppa)Cl]**

**Figure S15.** Mass spectrum of **[Co(dppa)]Cl**

**Figure S16.** Mass spectrum of [Ni(dppa)] (same as for [Ni(dppa)(H<sub>2</sub>O)<sub>2</sub>])

**Figure S17.** Mass spectrum of [Cu(dppa)]

**Figure S18.** Mass spectrum of [Zn(dppa)]

**Figure S19.** Mass spectrum of {[Ga(dppa)<sub>4</sub>]Cl<sub>4</sub>}

**Figure S20.** Mass spectrum of [Ni(H<sub>2</sub>dppp)]

**Figure S21.** Mass spectrum of {[Cu(H<sub>2</sub>dppp)]}

#### **Solid-state structures**

**Figure S22.** Molecular structure of H<sub>4</sub>dppp found in the crystal structure of H<sub>4</sub>dppp·3H<sub>2</sub>O.

#### **Overall protonation constants of the studied ligands and stability constants of their complexes**

**Table S1.** Overall protonation constants logβ of the studied ligands.

**Table S2.** Overall stability constants logβ of complexes with the studied.

#### **NMR titrations of the Zn<sup>II</sup>-ligand systems**

**Figure S23.** The <sup>1</sup>H NMR titration of the Zn<sup>II</sup>-H<sub>2</sub>dppa system.

**Figure S24.** The <sup>1</sup>H NMR and <sup>31</sup>P{<sup>1</sup>H} NMR titration of the Zn<sup>II</sup>-H<sub>4</sub>dppp system.

#### **UV-VIS spectroscopic titration of the Cu<sup>II</sup>-ligand systems**

**Figure S25.** The competitive UV-VIS titration of the Cu<sup>II</sup>-H<sub>2</sub>dppa-2,3,2-tet system.

**Figure S26.** The competitive UV-VIS titration of the Cu<sup>II</sup>-H<sub>4</sub>dppp-2,3,2-tet system.

**Figure S27.** The distribution diagram of the ternary Cu<sup>II</sup>-H<sub>2</sub>dppa-2,3,2-tet system.

#### **Distribution diagrams of M<sup>II</sup>-ligand systems**

**Figure S28.** Distribution diagram of the Ni<sup>II</sup>-dpph system.

**Figure S29.** Distribution diagram of the Ni<sup>II</sup>-H<sub>2</sub>dppa system.

**Figure S30.** Distribution diagram of the Ni<sup>II</sup>-H<sub>4</sub>dppp system.

**Figure S31.** Distribution diagram of the Zn<sup>II</sup>-dpph system.

**Figure S32.** Distribution diagram of the Zn<sup>II</sup>-H<sub>2</sub>dppa system.

**Figure S33.** Distribution diagram of the Zn<sup>II</sup>-H<sub>4</sub>dppp system.

#### **Crystallography**

**Table S3.** Crystallographic parameters of the studied compounds.

**Table S4.** Bond lengths and angles of the metal coordination sphere in the solid state.

## Synthesis of the studied ligands

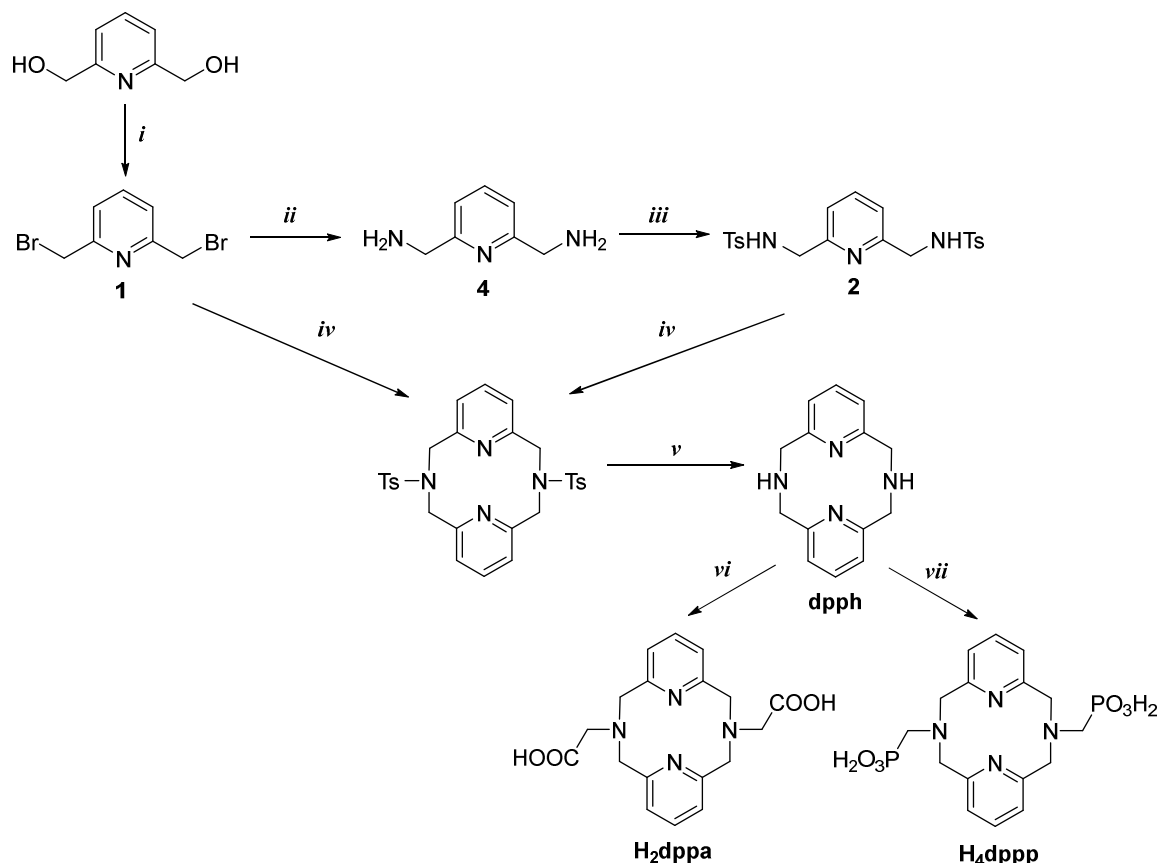

**Scheme S1.** Synthesis of ligands: (i): 33% HBr in AcOH, 100 °C. (ii): 1. potassium phthalimide, DMF, 100 °C, 2 d; 2. N<sub>2</sub>H<sub>4</sub>·H<sub>2</sub>O, EtOH, reflux, 1 d. (iii): TsCl, dichloromethane, Et<sub>3</sub>N, 1 d. (iv): tetrabutylammonium iodide, LiOH·H<sub>2</sub>O, dichloromethane/H<sub>2</sub>O, 45 °C, 12 h. (v): 98% H<sub>2</sub>SO<sub>4</sub>, 110 °C, 4 h. (vi): chloroacetic acid, LiOH·H<sub>2</sub>O, H<sub>2</sub>O, 60 °C, 1 d. (vii): 1. diethylphosphite, paraformaldehyde, pyridinium hydrobromide, pyridine, 40 °C, 1 d; 2. 6 M aq. HCl, 80 °C, 4 d.

### 2,6-bis(bromomethyl)pyridine (**1**)<sup>1</sup>

A solution of 2,6-pyridinedimethanol (8.0 g, 57.5 mmol) in 33% HBr in glacial AcOH (100 ml) was heated at 100 °C under a condenser for 90 min. Upon completion, the reaction mixture was poured onto crushed ice (200 ml), forming a precipitate. The pH of the resulting suspension was carefully adjusted to 9 using a 1M aq. NaOH. The precipitated product was isolated by vacuum filtration, washed with cold water, and dried under reduced pressure to yield a white solid (12.4 g, 81%).

<sup>1</sup>H NMR (DMSO-d<sub>6</sub>): 7.83 (t, <sup>3</sup>J<sub>HH</sub> 7.7, 1H, py), 7.48 (d, <sup>3</sup>J<sub>HH</sub> 7.7, 2H, py), 4.67 (s, 4H, CH<sub>2</sub>).

<sup>13</sup>C{<sup>1</sup>H} NMR (DMSO-d<sub>6</sub>): 156.6 (s, py), 138.5 (s, py), 123.2 (s, py), 34.4 (s, CH<sub>2</sub>). MS(+):

*m/z* 265.9 [M+H]<sup>+</sup>

### **2,6-bis(aminomethyl)pyridine (4) <sup>2</sup>**

A stirred solution of **1** (10.0 g, 38 mmol) and potassium phthalimide (14.0 g, 75 mmol) in *N,N*-dimethylformamide (50 ml) was heated at 100 °C for 48 h. Upon completion, the reaction mixture was cooled to room temperature and diluted with deionised water (80 ml), forming a white precipitate. The solid was collected by vacuum filtration and re-suspended in EtOH (100 ml). Hydrazine hydrate (7.8 ml) was added, and the mixture was refluxed for 24 h. After cooling to room temperature, 6M aq. HCl (80 ml) was added, and the mixture was refluxed for 2 h, and then was stirred at room temperature for the next 10 h. The solids were filtered off, and the filtrate was evaporated under reduced pressure. The resulting residue was dissolved in distilled water (100 ml), and the pH of the solution was adjusted to 12 using 6M KOH. The solution was extracted with chloroform (5×100 ml). The combined organic layers were dried with Na<sub>2</sub>SO<sub>4</sub>, filtered and concentrated under reduced pressure. The product, obtained as a brown-green oil, crystallised upon standing (3.91 g, 75%).

<sup>1</sup>H NMR (CDCl<sub>3</sub>): 7.58 (t, <sup>3</sup>J<sub>HH</sub> 7.6, 1H, py), 7.11 (d, <sup>3</sup>J<sub>HH</sub> 7.6, 2H, py), 3.93 (s, 4H, CH<sub>2</sub>). <sup>13</sup>C{<sup>1</sup>H} NMR (CDCl<sub>3</sub>): 161.3 (s, py), 137.0 (s, py), 119.2 (s, py), 47.6 (s, CH<sub>2</sub>). MS(+): *m/z* 138.1 [M+H]<sup>+</sup>.

### **2,6-bis{[(4-methylphenyl)sulfonamido]methyl}pyridine (2) <sup>3</sup>**

Triethylamine (6.4 ml, 45.6 mmol) and **4** (3.0 g, 21.7 mmol) were dissolved in dichloromethane (100 ml), and the solution was cooled to 0 °C in an ice bath. A solution of *p*-toluenesulfonyl chloride (8.3 g, 45.6 mmol, 2.1 equiv.) in dichloromethane (100 ml) was added dropwise. After the addition was complete, the reaction mixture was allowed to warm to room temperature and stirred for 24 h. The organic phase was washed successively with distilled water (150 ml) and saturated aq. NaCl (100 ml), and dried with anhydrous MgSO<sub>4</sub>. After filtration, the solvent was removed under reduced pressure to yield a crude orange solid. The crude product was purified by column chromatography on silica gel using a mixture of dichloromethane and ethyl acetate (9:1, v/v) as the eluent. Evaporation of solvent gave the product as a light yellow powder (8.91 g, 92%).

<sup>1</sup>H NMR (CDCl<sub>3</sub>): 7.69 (d, <sup>3</sup>J<sub>HH</sub> 7.2, 4H, Ts), 7.48 (t, <sup>3</sup>J<sub>HH</sub> 7.7, 1H, py), 7.19 (d, <sup>3</sup>J<sub>HH</sub> 7.2, 4H, Ts), 7.02 (d, <sup>3</sup>J<sub>HH</sub> 7.7, 2H, py), 6.02 (t, <sup>3</sup>J<sub>HH</sub> 5.8, 2H, NH), 4.14 (d, <sup>3</sup>J<sub>HH</sub> 5.8, 4H, CH<sub>2</sub>), 2.36 (s, 6H, CH<sub>3</sub>). <sup>13</sup>C{<sup>1</sup>H} NMR (CDCl<sub>3</sub>): 154.8 (s, py), 143.5 (s, Ts), 137.7 (s, Ts), 136.8 (s, py), 129.7 (s, Ts), 127.3 (s, Ts), 120.8 (s, py), 47.4 (s, CH<sub>2</sub>), 21.6 (s, CH<sub>3</sub>). MS(+): *m/z* 446.1 [M+H]<sup>+</sup>.

## NMR spectra of the studied ligands

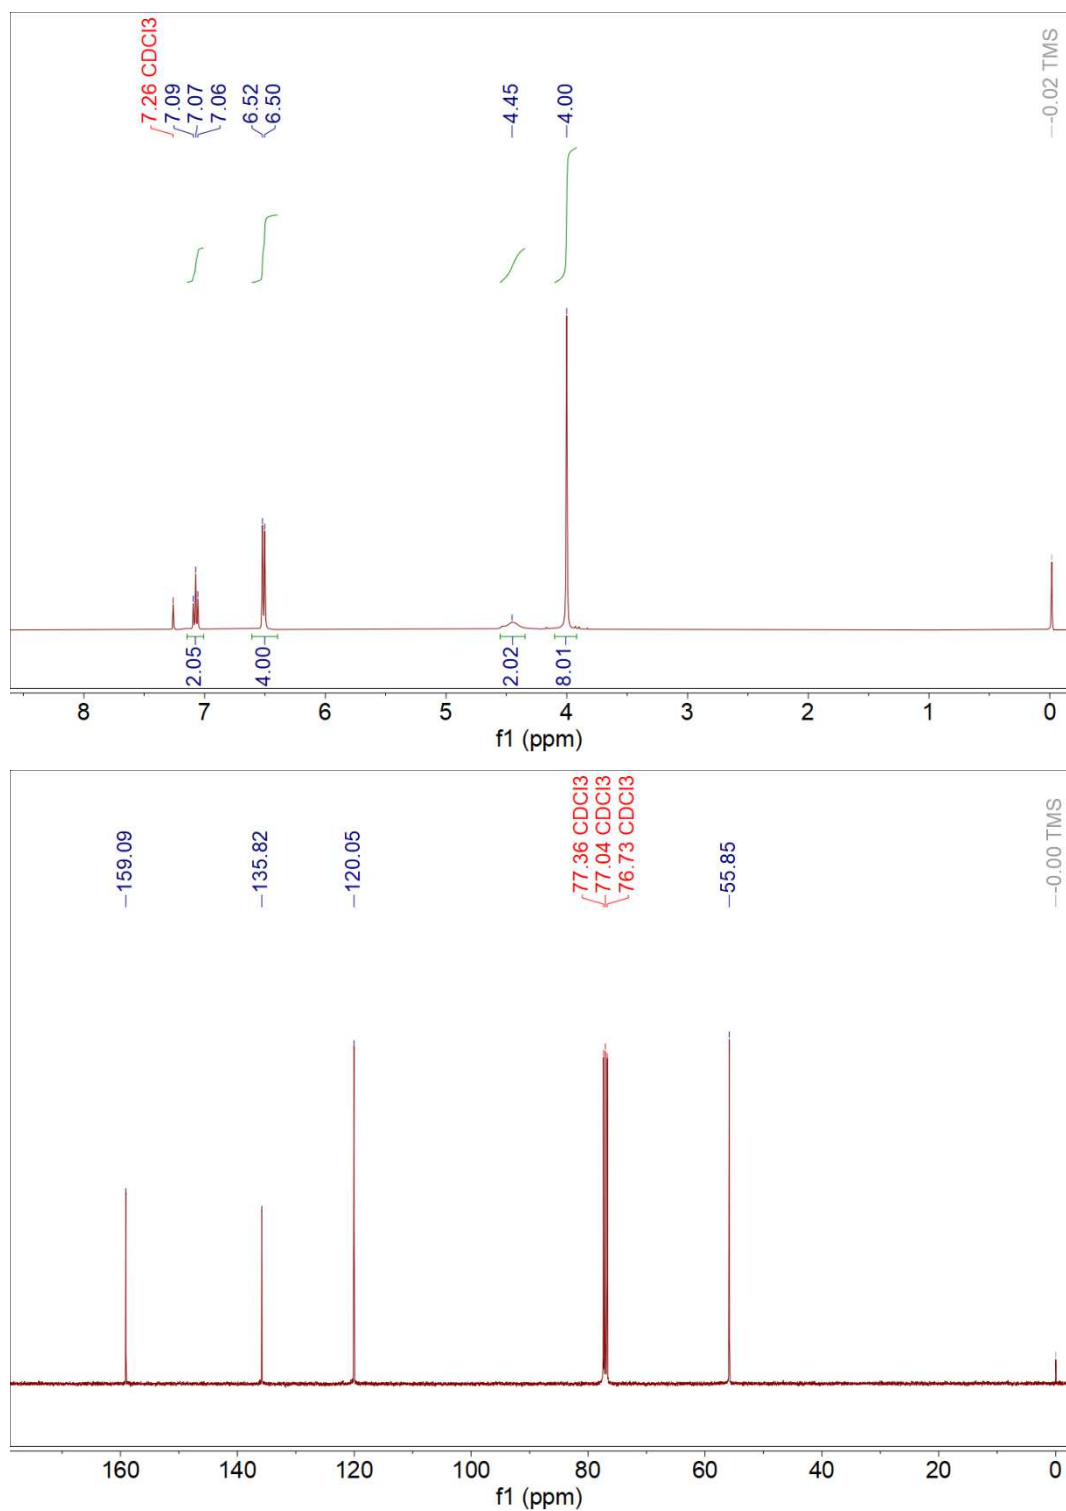

**Figure S1.** The  $^1\text{H}$  (top) and  $^{13}\text{C}\{^1\text{H}\}$  (bottom) NMR spectra of **dpph** in  $\text{CDCl}_3$  (300 MHz, 25  $^\circ\text{C}$ ).

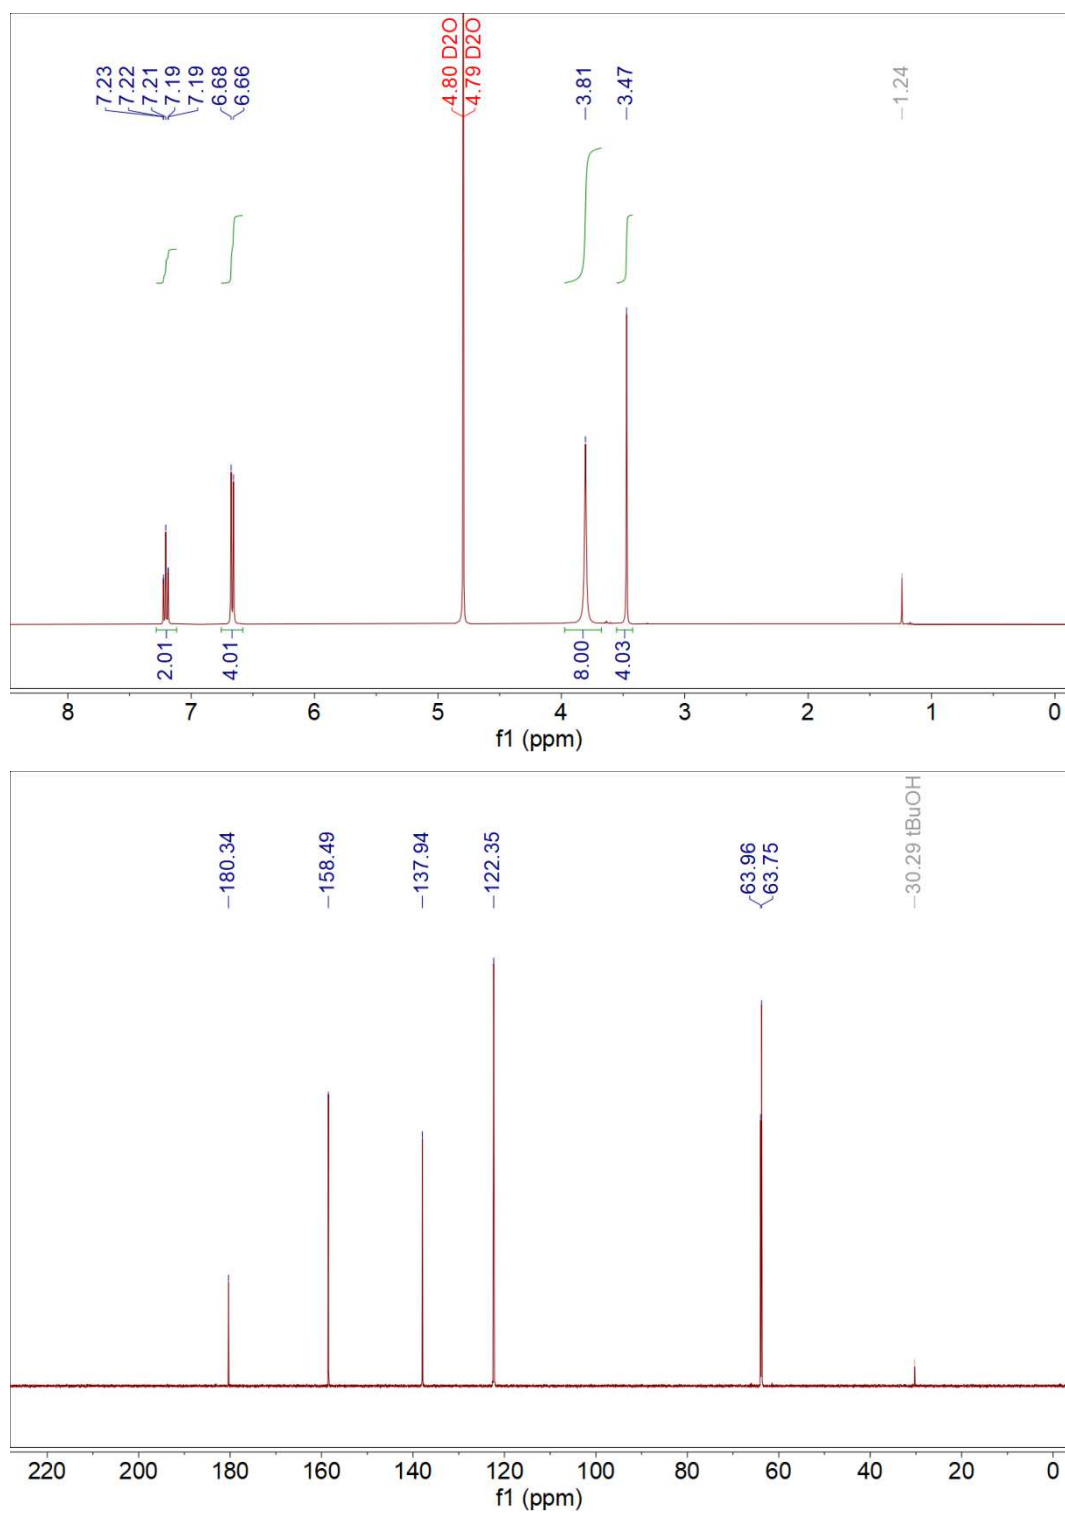

**Figure S2.** The  $^1\text{H}$  (top) and  $^{13}\text{C}\{^1\text{H}\}$  (bottom) NMR spectra of  $\text{H}_2\text{dppa}$  in  $\text{D}_2\text{O}/\text{NaOH}$ , pD  $\sim 13.0$  (300 MHz, 25  $^\circ\text{C}$ ).

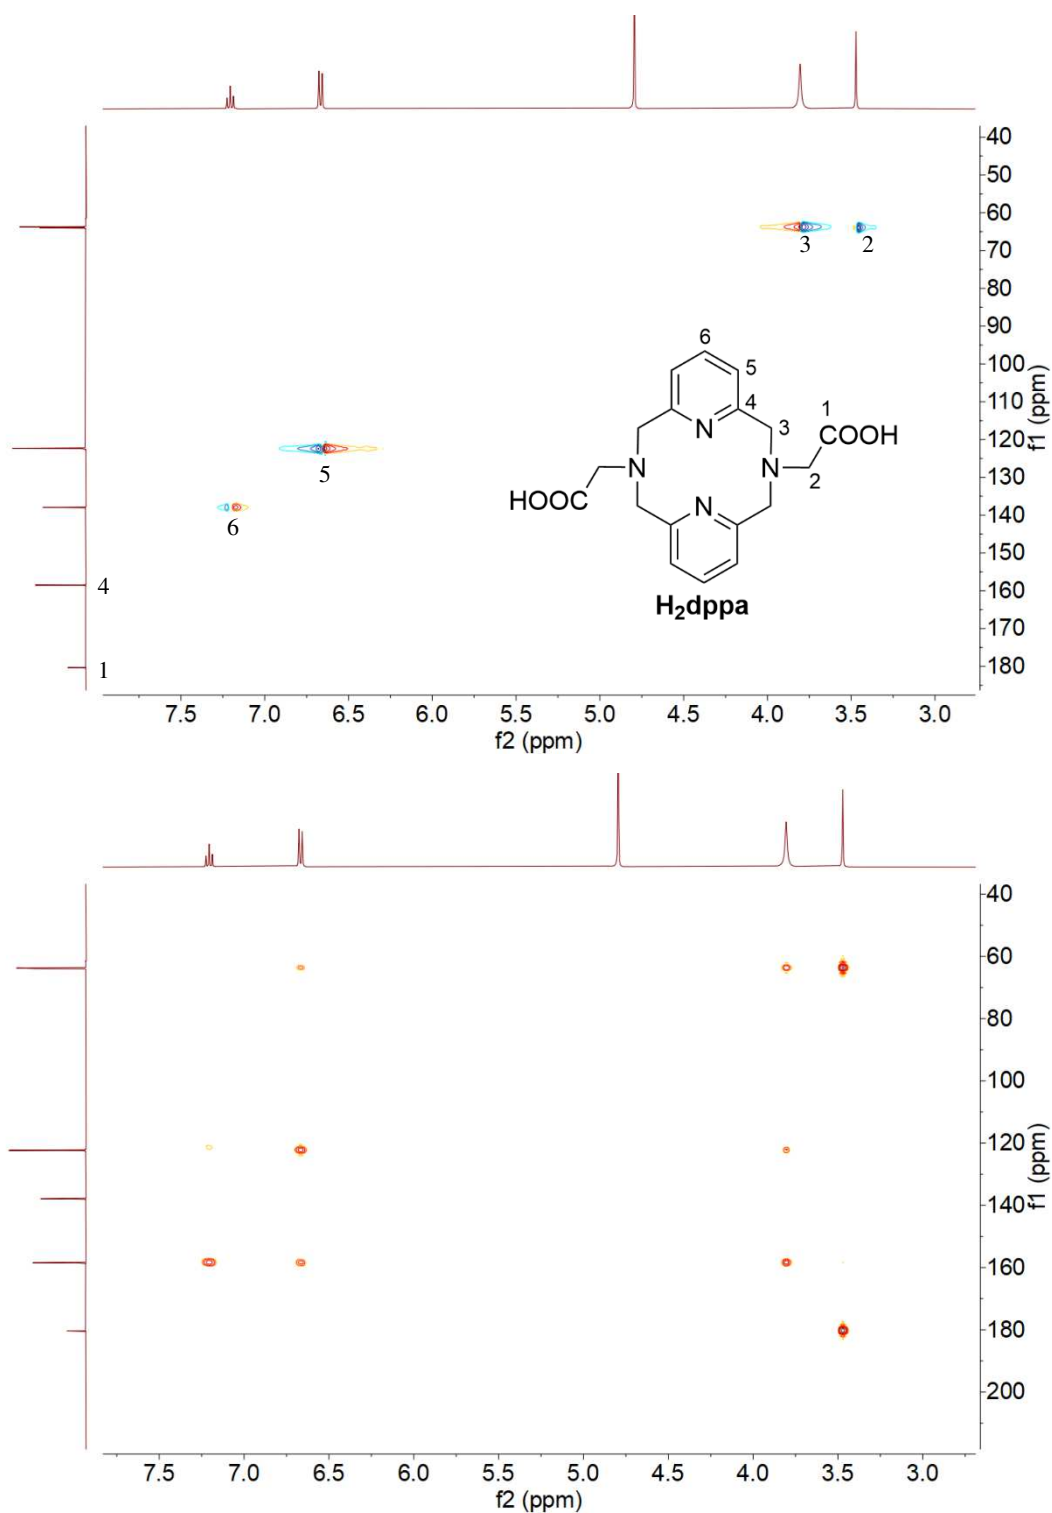

**Figure S3.** The <sup>1</sup>H-<sup>13</sup>C HSQC (top) and HMBC (bottom) NMR spectra of **H<sub>2</sub>dppa** in D<sub>2</sub>O/NaOH, pD ~13.0 (300 MHz, 25 °C).

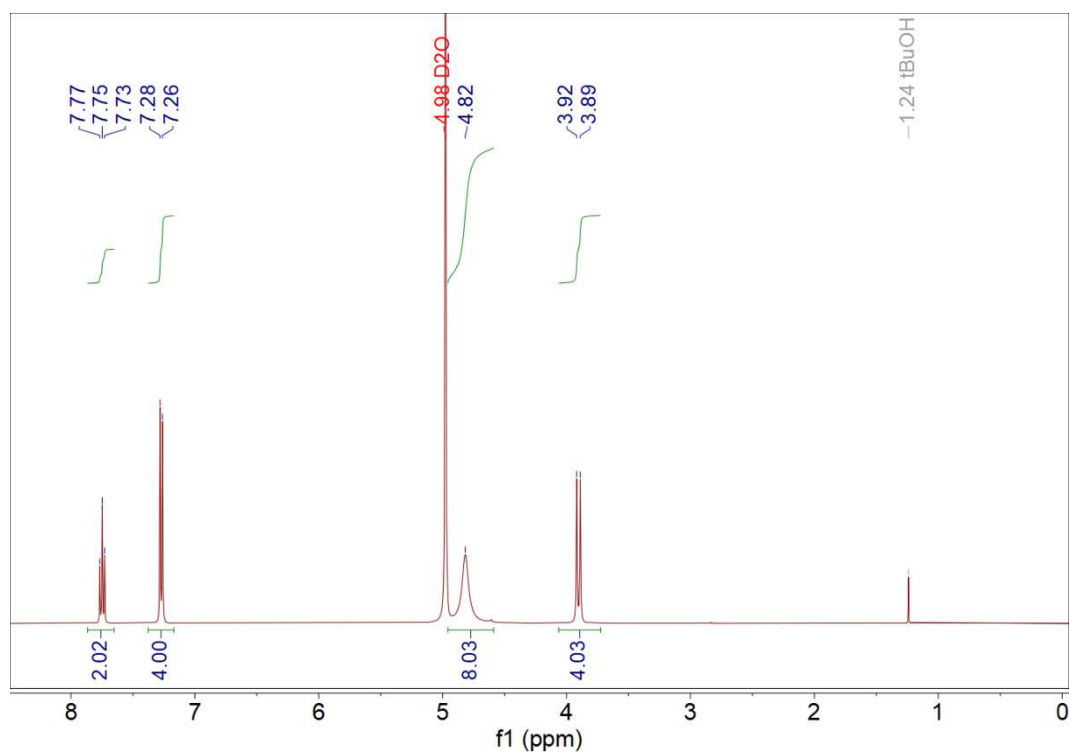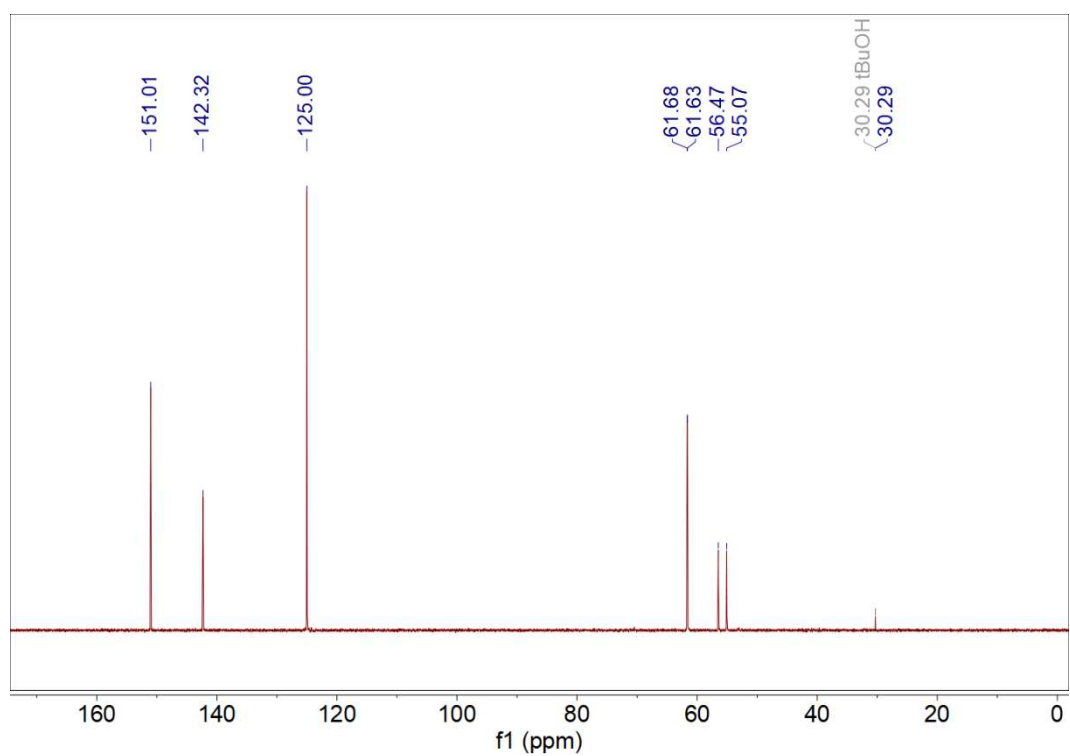

**Figure S4.** The  $^1\text{H}$  (top) and  $^{13}\text{C}\{^1\text{H}\}$  (bottom) NMR spectra of  $\text{H}_4\text{dppp}$  in  $\text{D}_2\text{O}/\text{DCI}$ , pH  $\sim 0.8$  (300 MHz, 25  $^\circ\text{C}$ ).

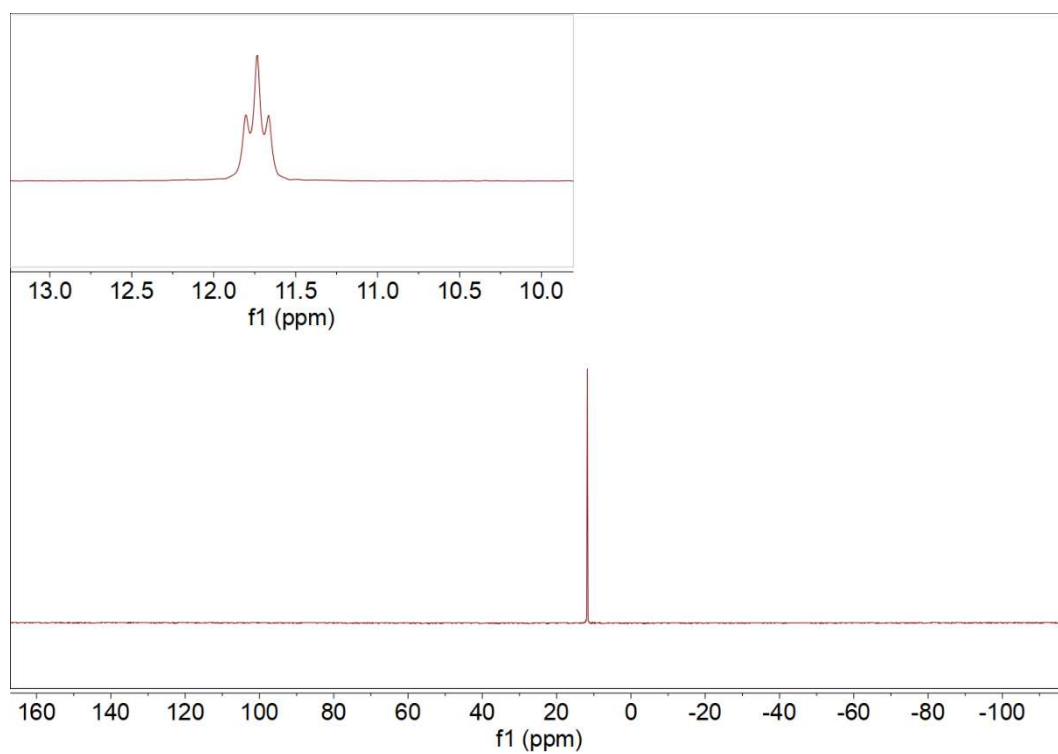

**Figure S5.** The  $^{31}\text{P}\{^1\text{H}\}$  and  $^{31}\text{P}$  (inset) NMR spectra of H<sub>4</sub>dppp in D<sub>2</sub>O/DCl, pH ~0.8 (300 MHz, 25 °C).

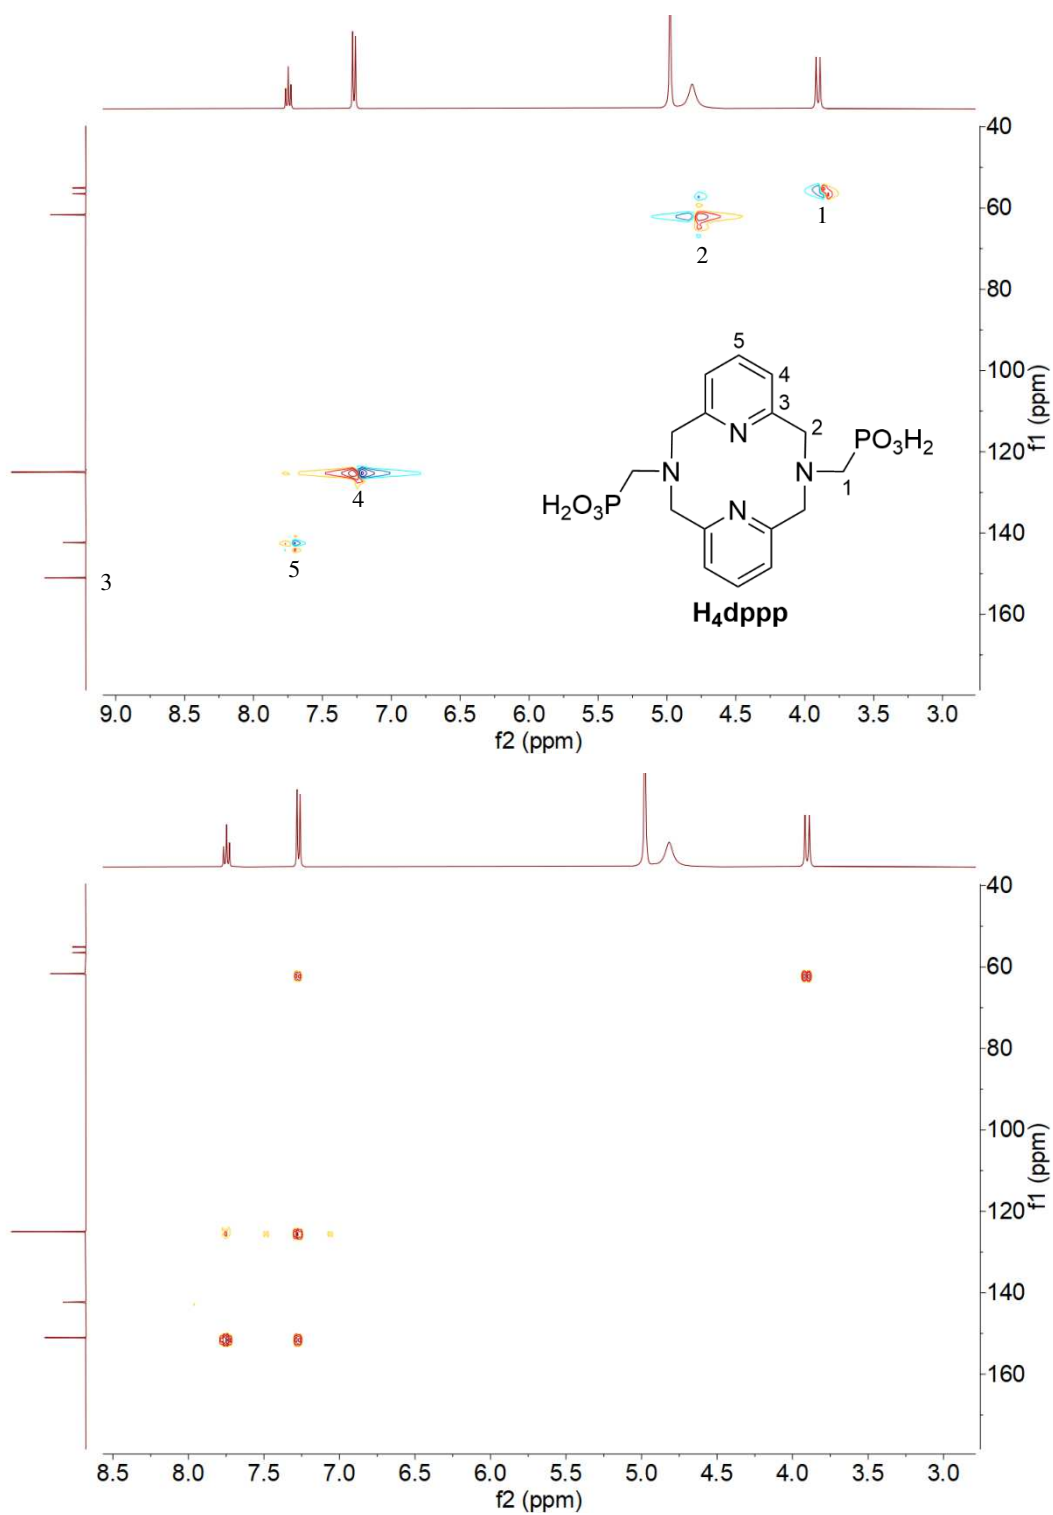

**Figure S6.** The  $^1H$ - $^{13}C$  HSQC (top) and HMBC (bottom) NMR spectra of  $H_4dppp$  in  $D_2O/DCI$ , pH  $\sim 0.8$  (300 MHz, 25  $^{\circ}C$ ).

### Mass Spectra (ESI, positive mode)

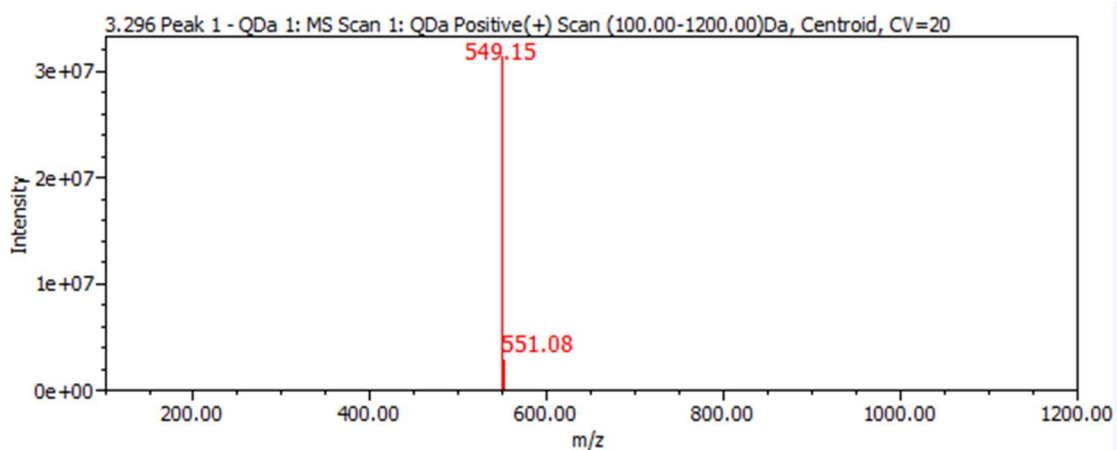

Figure S7. Mass spectrum of **compound 3**

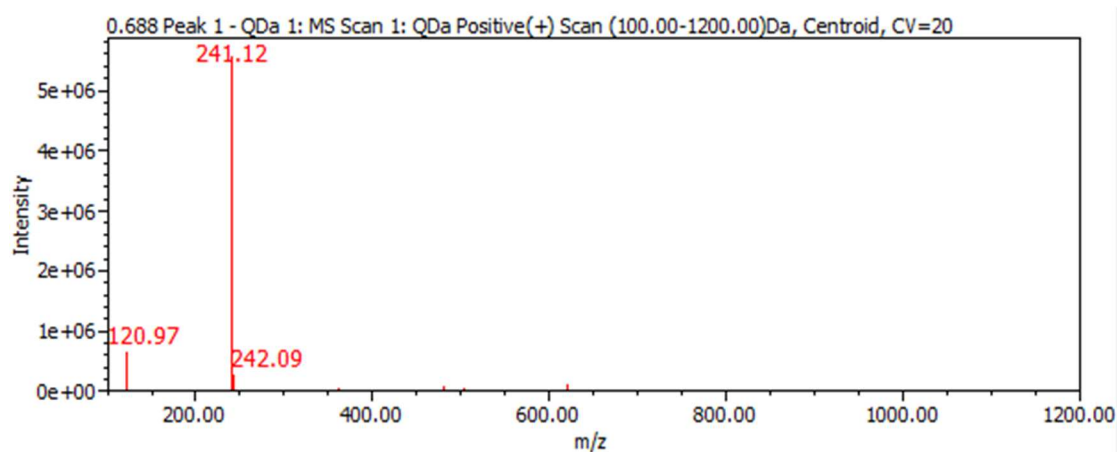

Figure S8. Mass spectrum of **dpph**

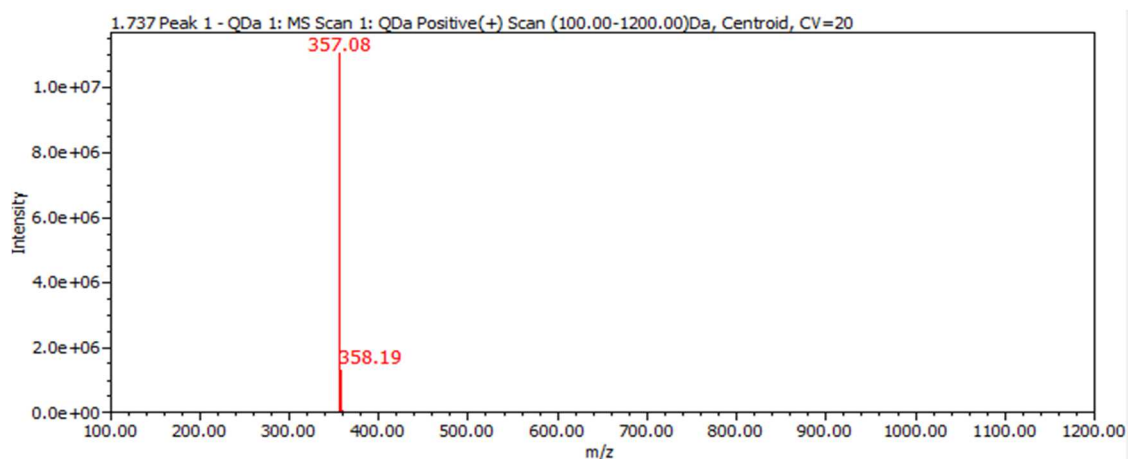

Figure S9. Mass spectrum of **H<sub>2</sub>dppa**

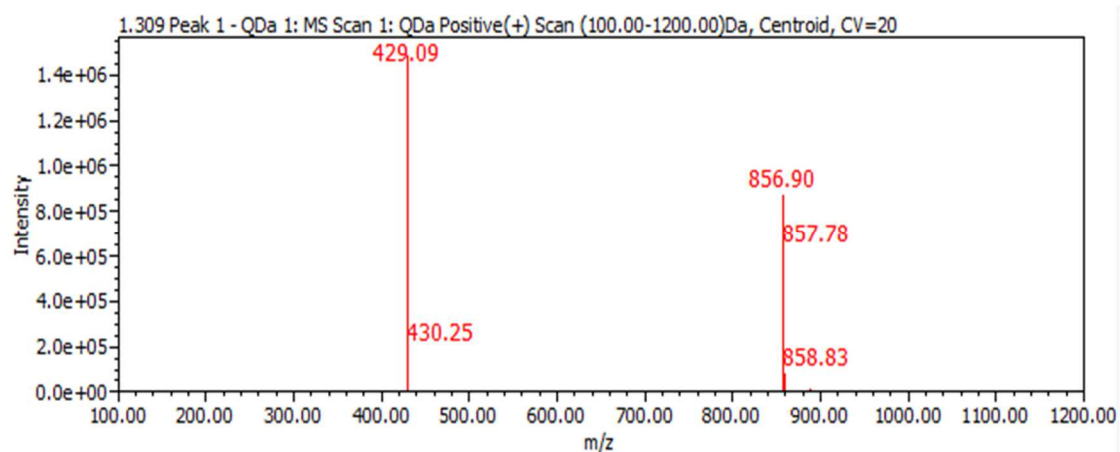

**Figure S10.** Mass spectrum of **H<sub>4</sub>dppp**

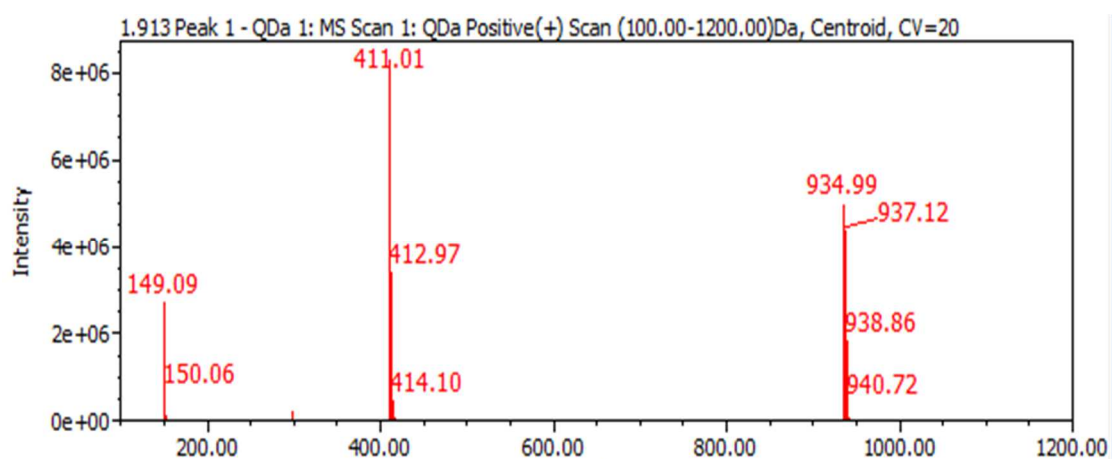

**Figure S11.** Mass spectrum of **[Ni(dpp)Cl<sub>2</sub>]**

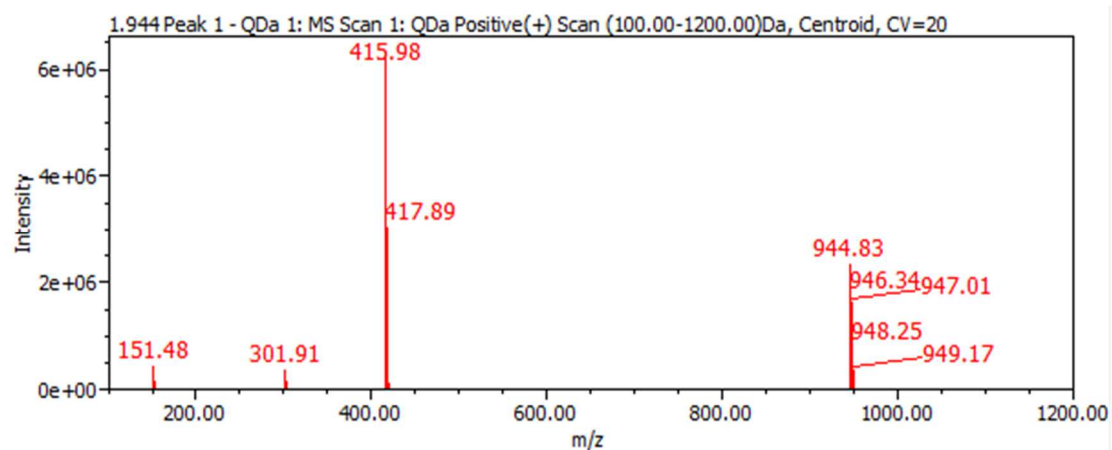

**Figure S12.** Mass spectrum of **[Cu(dpp)Cl<sub>2</sub>]**

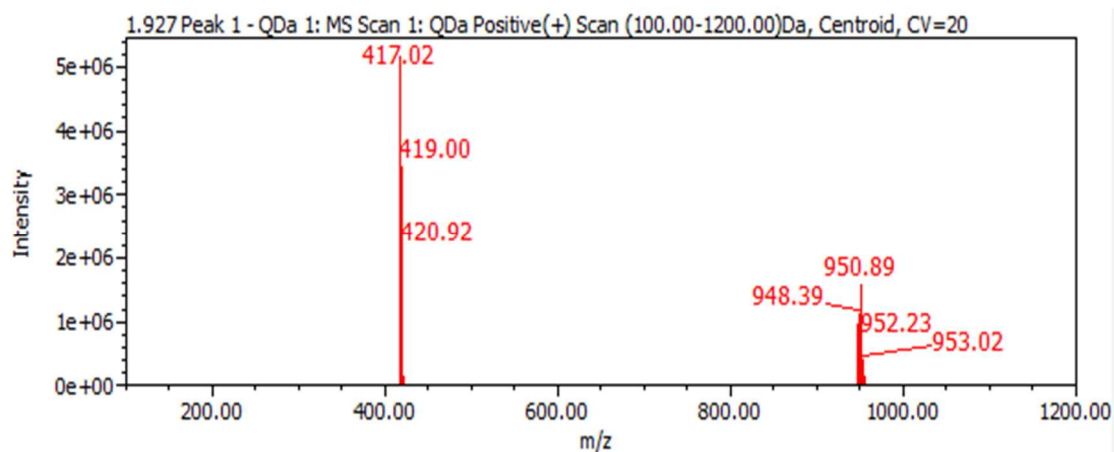

**Figure S13.** Mass spectrum of  $[\text{Zn}(\text{dpp})\text{Cl}_2]$

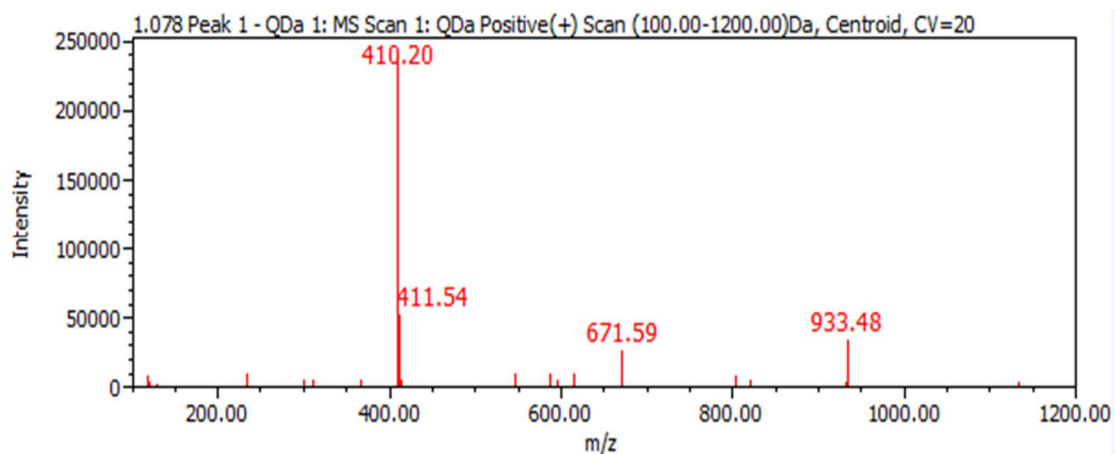

**Figure S14.** Mass spectrum of  $[\text{Fe}(\text{dppa})\text{Cl}]$

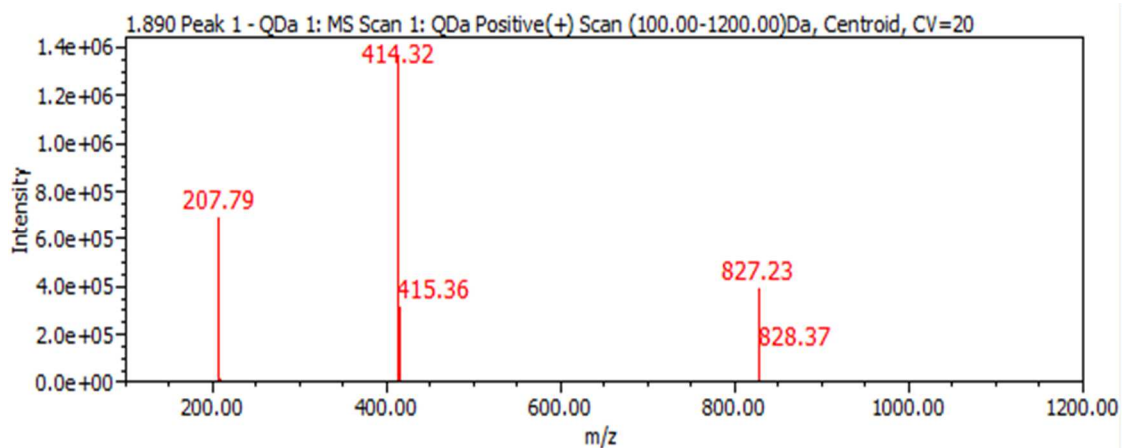

**Figure S15.** Mass spectrum of  $[\text{Co}(\text{dppa})\text{Cl}]$

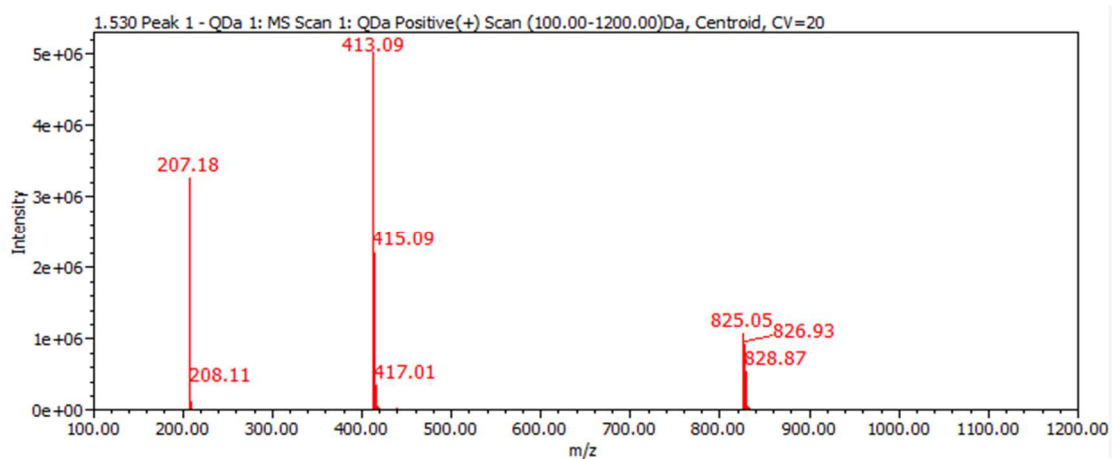

**Figure S16.** Mass spectrum of  $[\text{Ni}(\text{dppa})]$  (same as for  $[\text{Ni}(\text{dppa})(\text{H}_2\text{O})_2]$ )

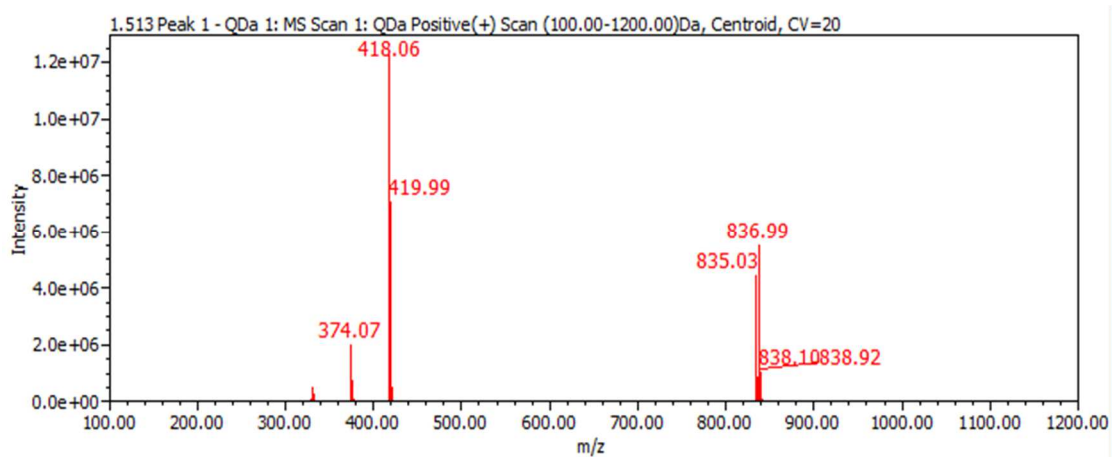

**Figure S17.** Mass spectrum of  $[\text{Cu}(\text{dppa})]$

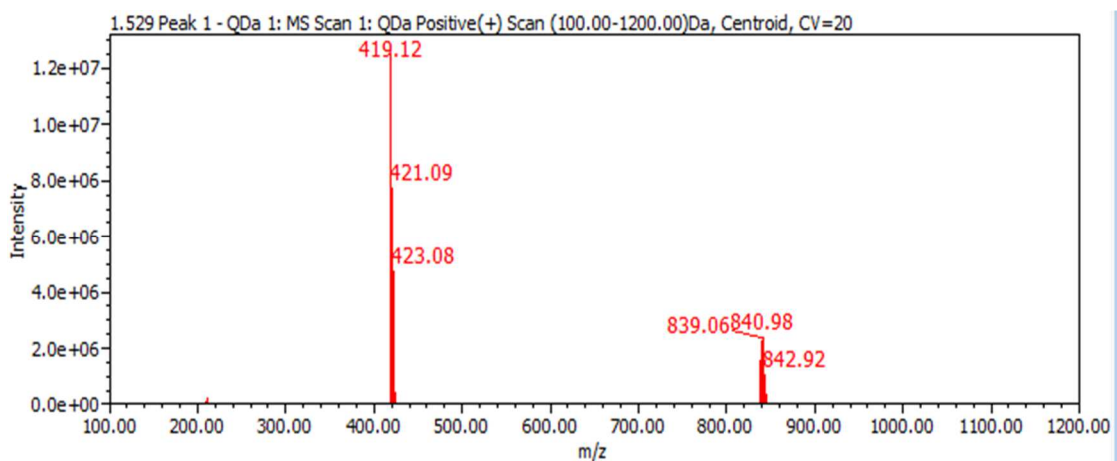

**Figure S18.** Mass spectrum of  $[\text{Zn}(\text{dppa})]$

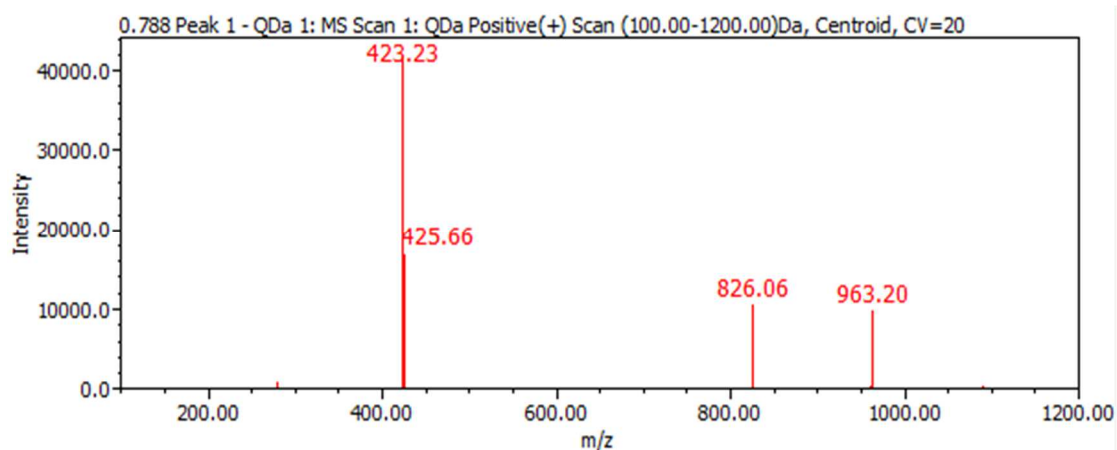

**Figure S19.** Mass spectrum of  $\{[\text{Ga}(\text{dppa})_4]\text{Cl}_4$

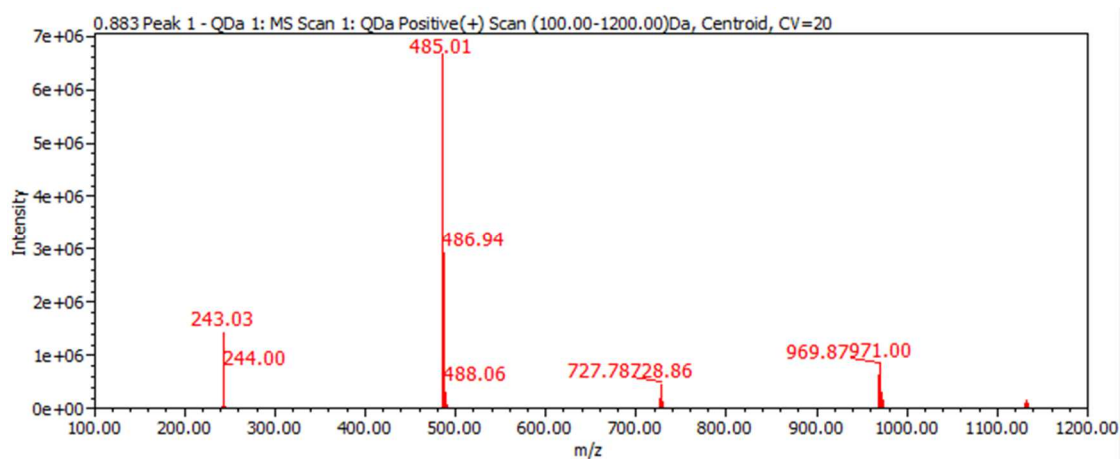

**Figure S20.** Mass spectrum of  $[\text{Ni}(\text{H}_2\text{dppp})]$

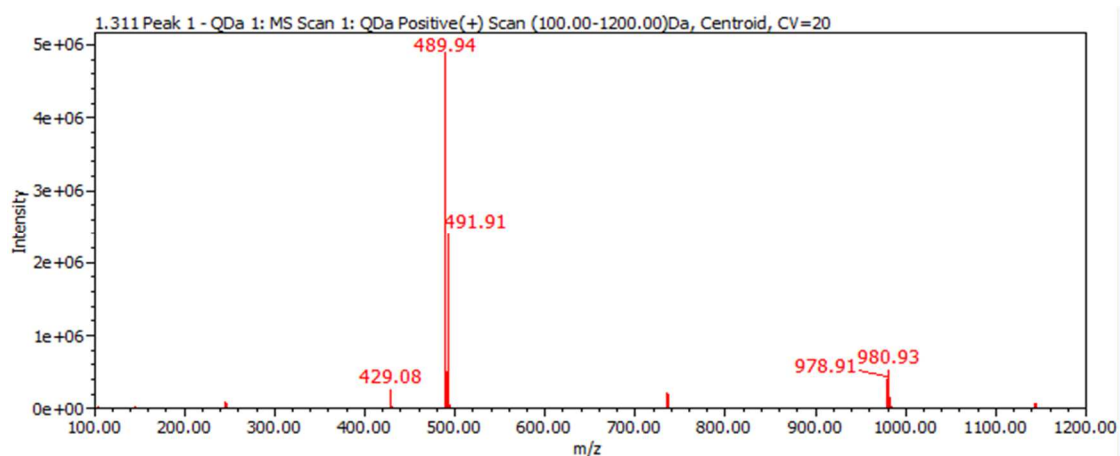

**Figure S21.** Mass spectrum of  $\{[\text{Cu}(\text{H}_2\text{dppp})]_2\}$

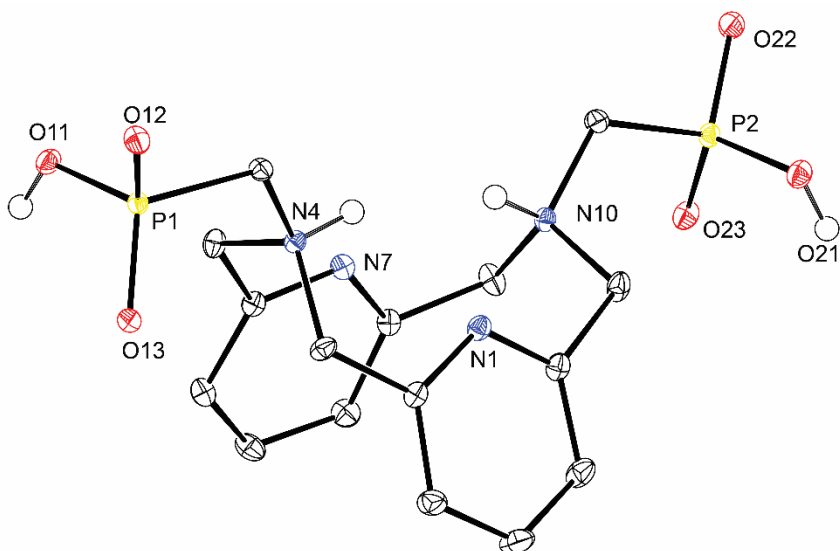

**Figure S22.** Molecular structure of  $\text{H}_4\text{dppp}$  found in the crystal structure of  $\text{H}_4\text{dppp}\cdot 3\text{H}_2\text{O}$ . The carbon-bound hydrogen atoms are not shown for clarity. Thermal ellipsoids are drawn at 50%.

**Overall protonation constants of the studied ligands and stability constants of their complexes**

**Table S1.** Overall protonation constants  $\log\beta$  of the studied ligands (25 °C,  $I = 0.1$  M NMe<sub>4</sub>Cl).

| Species          | <b>dpph</b> | <b>H<sub>2</sub>dppa</b> | <b>H<sub>4</sub>dppp</b> |
|------------------|-------------|--------------------------|--------------------------|
| HL               | 8.04(1)     | 9.62(1)                  | 9.98(1)                  |
| H <sub>2</sub> L | 15.32(1)    | 15.51(1)                 | 18.52(1)                 |
| H <sub>3</sub> L | –           | 17.78(1)                 | 24.96(1)                 |
| H <sub>4</sub> L | –           | 19.11(2)                 | 28.86(1)                 |
| H <sub>5</sub> L | –           | –                        | 29.77(2)                 |

**Table S2.** Overall stability constants  $\log\beta$  of complexes with the studied ligands (25 °C,  $I = 0.1$  M NMe<sub>4</sub>Cl).

| Ligand                   | Equilibrium                                            | Metal ion        |                  |                  |
|--------------------------|--------------------------------------------------------|------------------|------------------|------------------|
|                          |                                                        | Ni <sup>II</sup> | Cu <sup>II</sup> | Zn <sup>II</sup> |
| <b>dpph</b>              | $M + L \rightleftharpoons [M(L)]$                      | 14.54(2)         | 15.98(2)         | 13.09(1)         |
|                          | $M + L + H_2O \rightleftharpoons [M(L)(OH)] + H^+$     | 3.18(2)          | 7.10(2)          | 3.49(1)          |
|                          | $M + L + 2H_2O \rightleftharpoons [M(L)(OH)_2] + 2H^+$ | –                | –5.47(2)         | –                |
| <b>H<sub>2</sub>dppa</b> | $M + L \rightleftharpoons [M(L)]$                      | 14.29(3)         | 20.48(1)         | 17.50(3)         |
|                          | $M + L + H^+ \rightleftharpoons [M(HL)]$               | 17.12(3)         | 22.72(2)         | 19.85(2)         |
|                          | $M + L + 2H^+ \rightleftharpoons [M(H_2L)]$            | –                | 24.76(2)         | –                |
|                          | $M + L + H_2O \rightleftharpoons [M(L)(OH)] + H^+$     | –                | 9.16(2)          | 5.20(3)          |
| <b>H<sub>4</sub>dppp</b> | $M + L \rightleftharpoons [M(L)]$                      | 17.51(5)         | 22.64(2)         | 18.93(6)         |
|                          | $M + L + H^+ \rightleftharpoons [M(HL)]$               | 24.05(4)         | 28.84(2)         | 24.73(5)         |
|                          | $M + L + 2H^+ \rightleftharpoons [M(H_2L)]$            | 29.01(4)         | 33.60(3)         | 29.18(3)         |
|                          | $M + L + 3H^+ \rightleftharpoons [M(H_3L)]$            | –                | 34.97(3)         | –                |

## NMR titrations of the Zn<sup>II</sup>-ligand systems

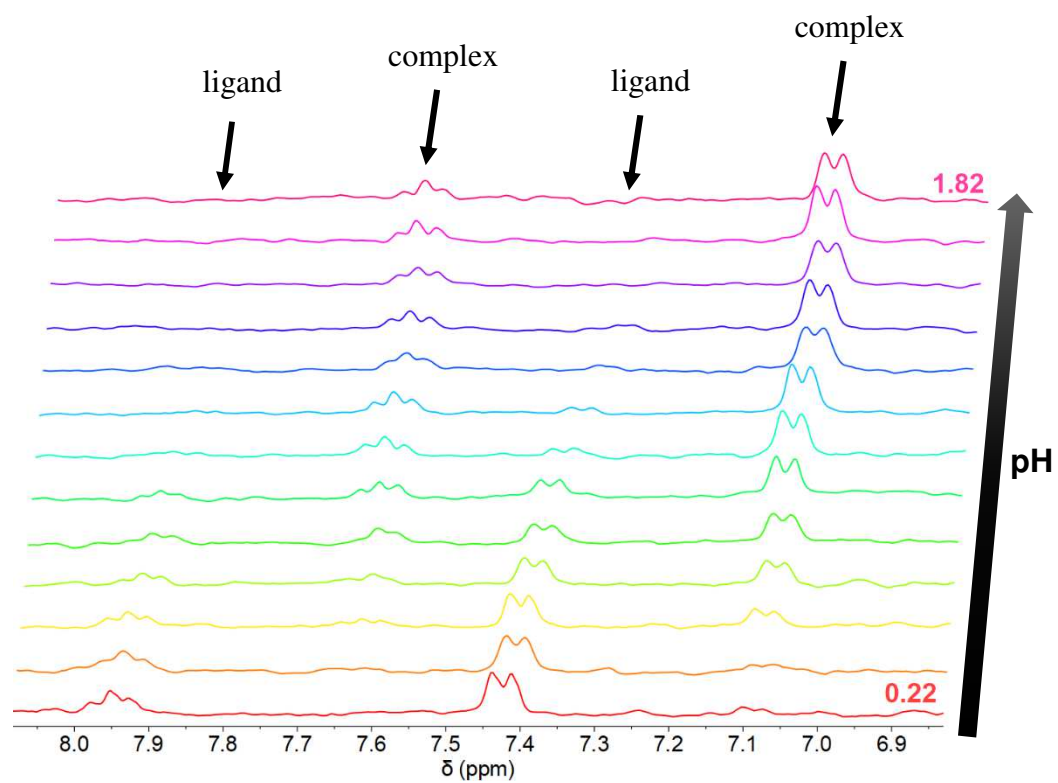

**Figure S23.** The <sup>1</sup>H NMR titration of the Zn<sup>II</sup>-H<sub>2</sub>dppa system ( $c_M = c_L = 4$  mM, pH 0.22–1.82, 300 MHz, 25 °C).

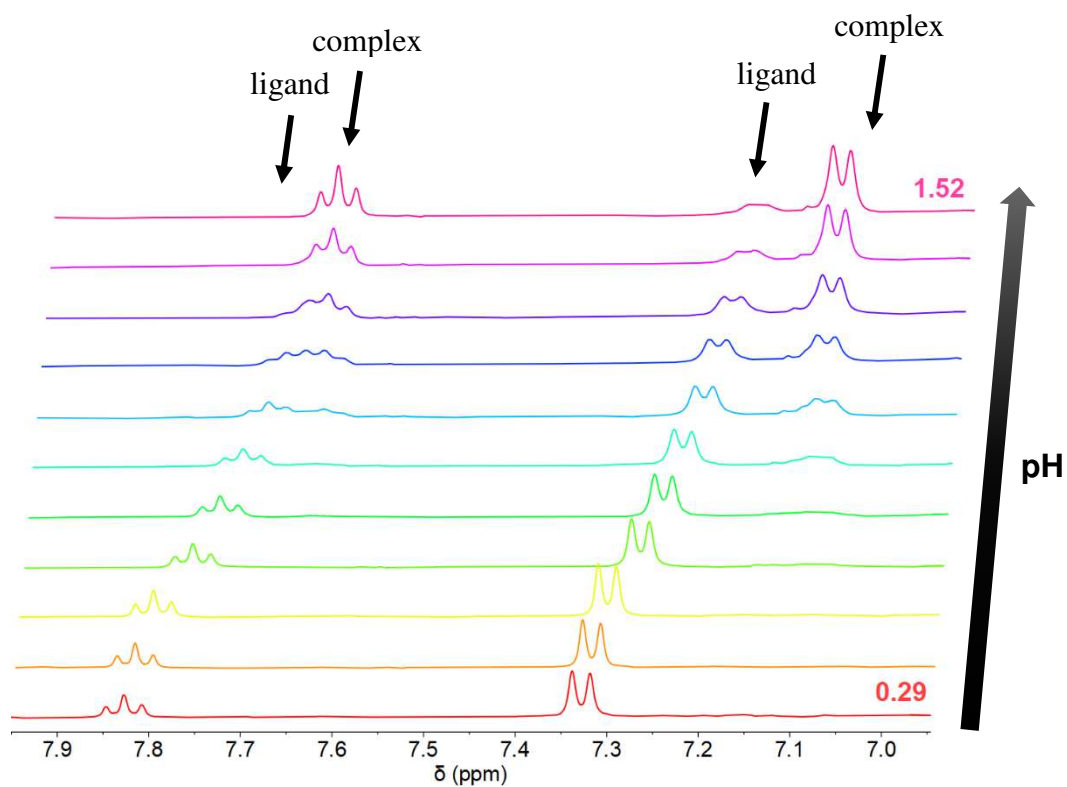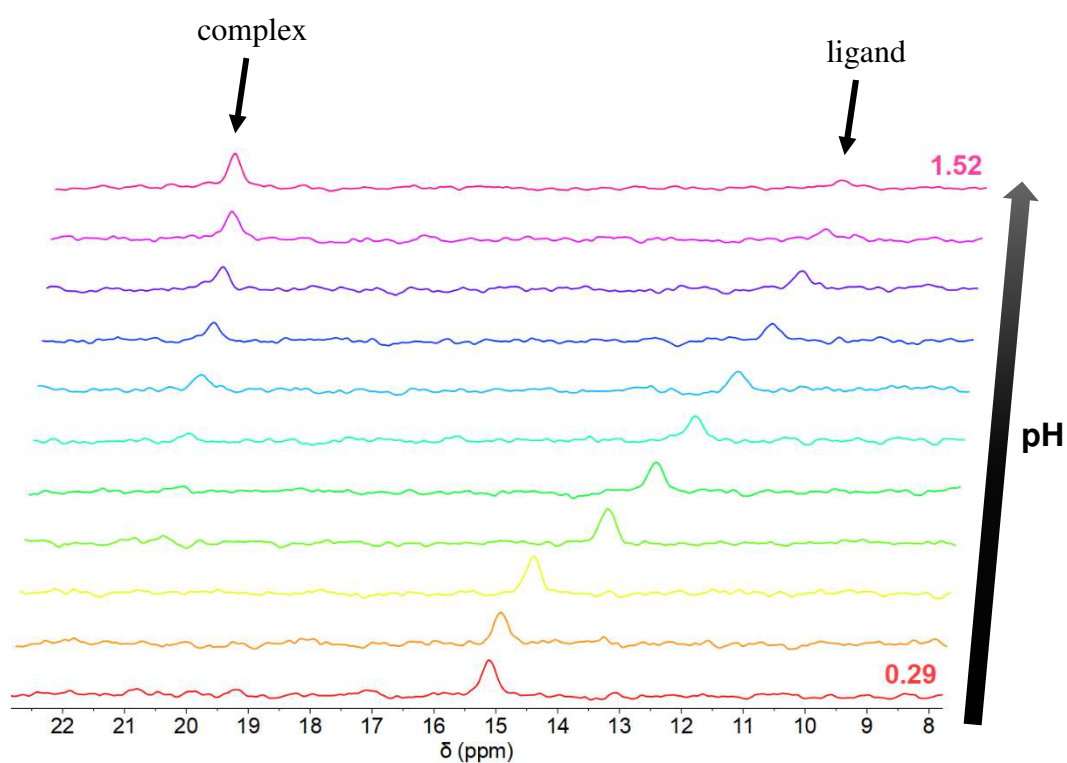

**Figure S24.** The  $^1\text{H}$  NMR (top) and  $^{31}\text{P}\{^1\text{H}\}$  NMR (bottom) titration of the  $\text{Zn}^{\text{II}}\text{-H}_4\text{dppp}$  system ( $c_{\text{M}} = c_{\text{L}} = 4$  mM, pH 0.29–1.52, 25 °C).

## UV-VIS spectroscopic titration of the Cu<sup>II</sup>-ligand systems

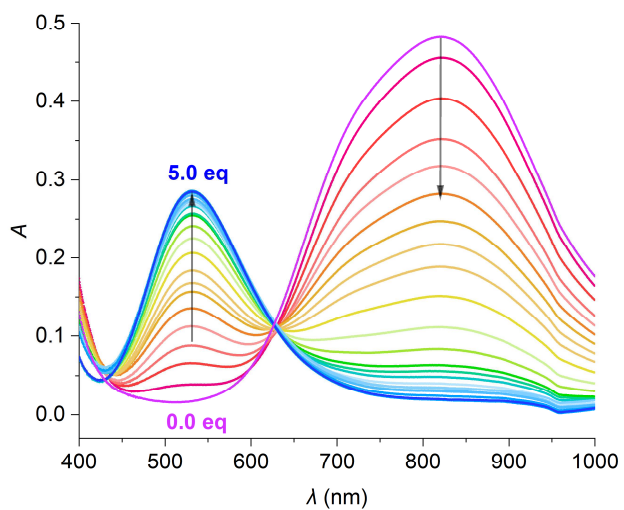

**Figure S25.** The competitive UV-VIS titration of the Cu<sup>II</sup>-H<sub>2</sub>dppa-2,3,2-tet system ( $c_{\text{Cu}} = 4$  mM,  $c_{\text{dppa}} = 4$  mM,  $c_{232\text{-tet}} = 0\text{--}20$  mM, pH 7.7, 25 °C).

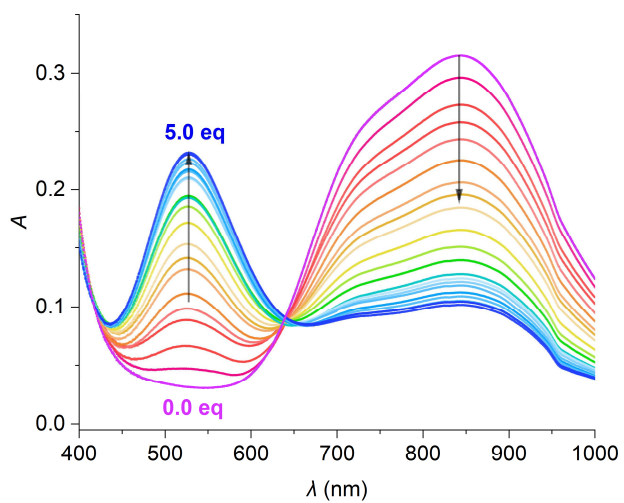

**Figure S26.** The competitive UV-VIS titration of the Cu<sup>II</sup>-H<sub>4</sub>dppp-2,3,2-tet system ( $c_{\text{Cu}} = 4$  mM,  $c_{\text{dppp}} = 4$  mM,  $c_{232\text{-tet}} = 0\text{--}20$  mM, pH 7.3, 25 °C).

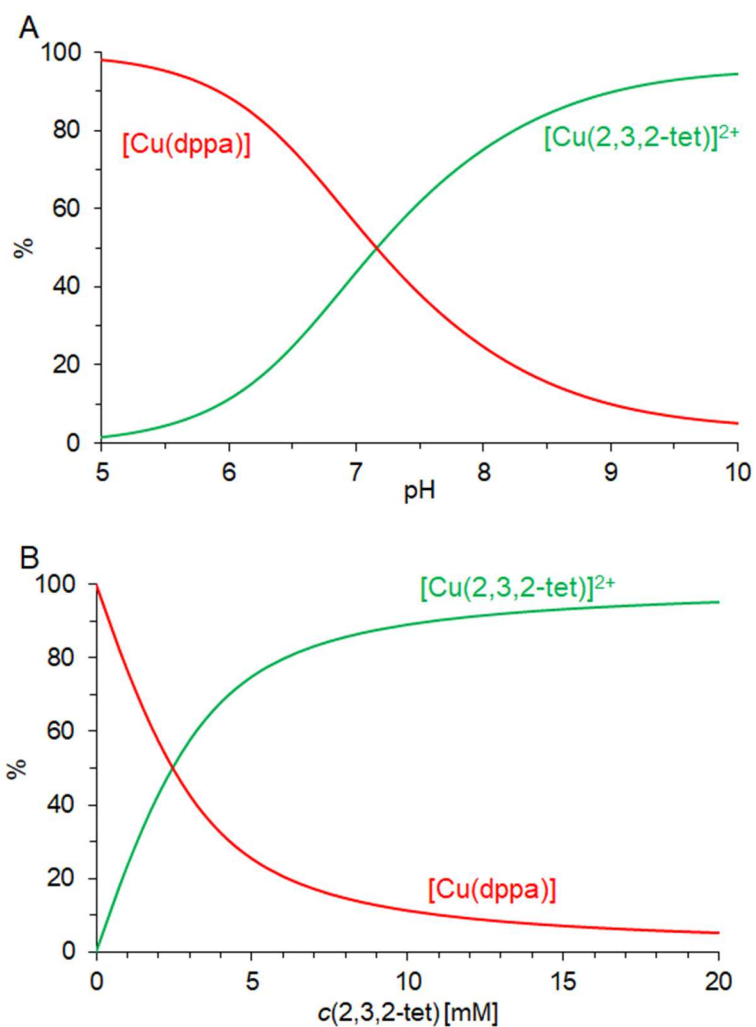

**Figure S27.** The distribution diagram of the ternary  $Cu^{II}$ - $H_2dppa$ -**2,3,2-tet** system as function in the neutral region of pH (**A**,  $c_{Cu} = 4$  mM,  $c_{dppa} = 4$  mM,  $c_{232-tet} = 4$  mM) or as function of **2,3,2-tet** concentration (**B**,  $c_{Cu} = 4$  mM,  $c_{dppa} = 4$  mM, pH 7.7).

## Distribution diagrams of $M^{II}$ -ligand systems

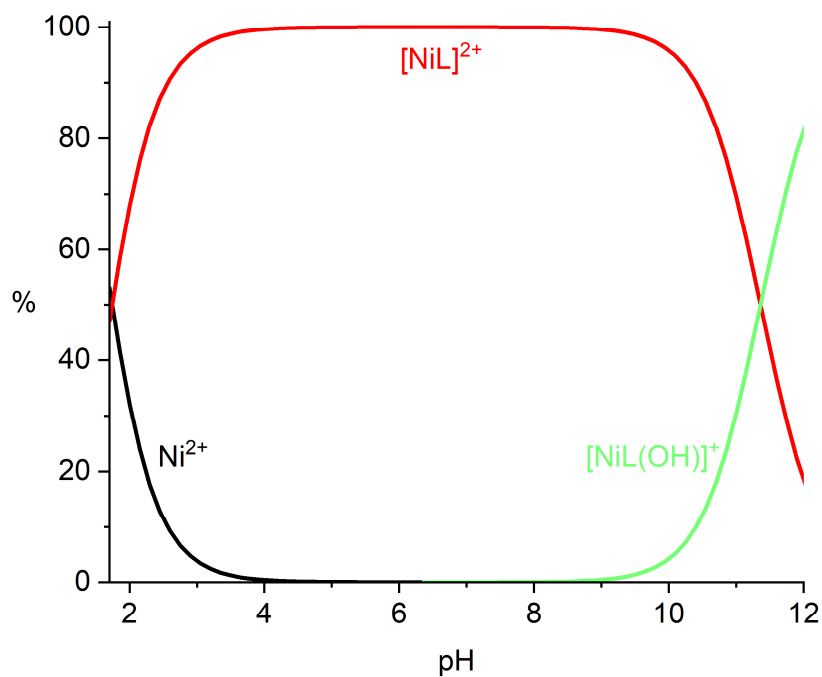

**Figure S28.** Distribution diagram of the Ni<sup>II</sup>-**dpph** system ( $c_M = c_L = 4$  mM, 25 °C).

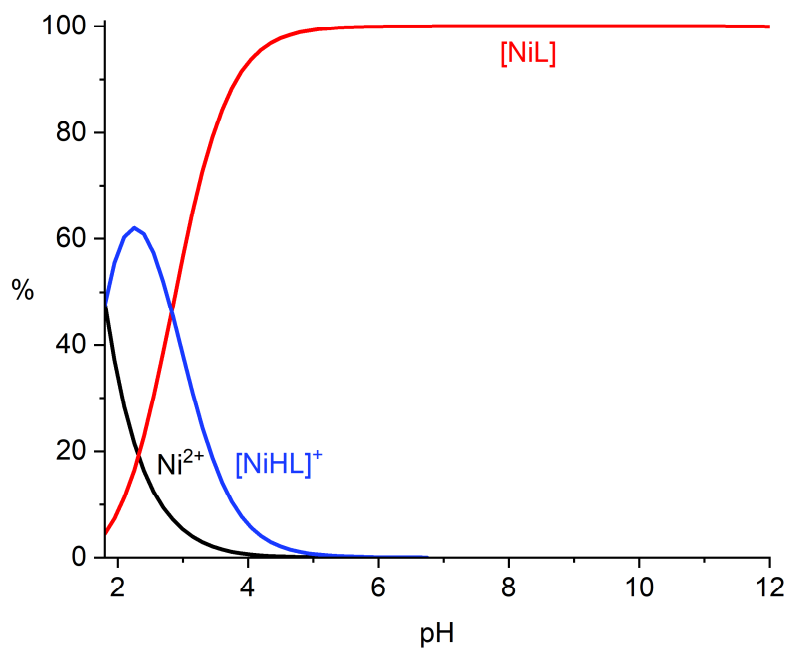

**Figure S29.** Distribution diagram of the Ni<sup>II</sup>-H<sub>2</sub>**dppa** system ( $c_M = c_L = 4$  mM, 25 °C).

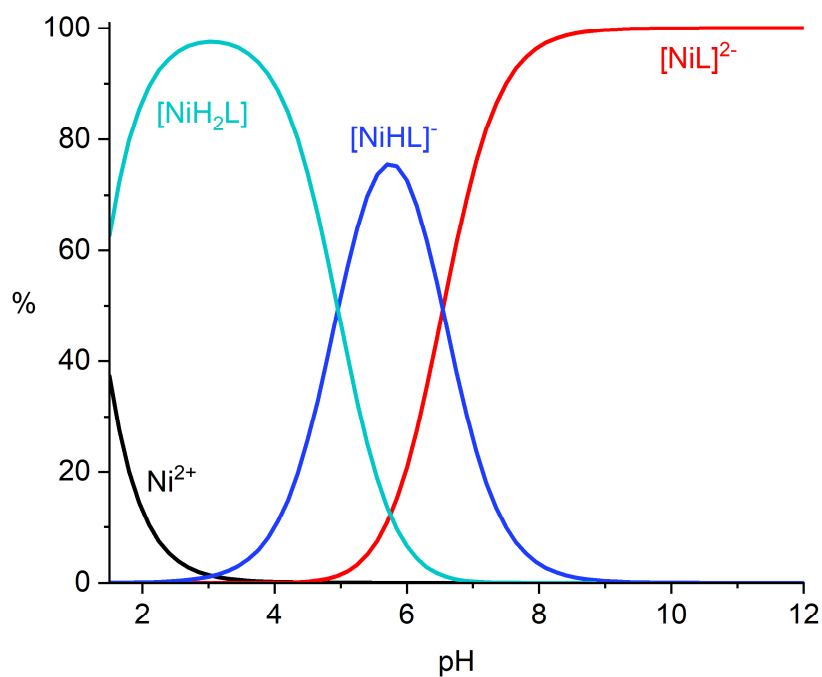

**Figure S30.** Distribution diagram of the Ni<sup>II</sup>-H<sub>4</sub>dppp system ( $c_M = c_L = 4$  mM, 25 °C).

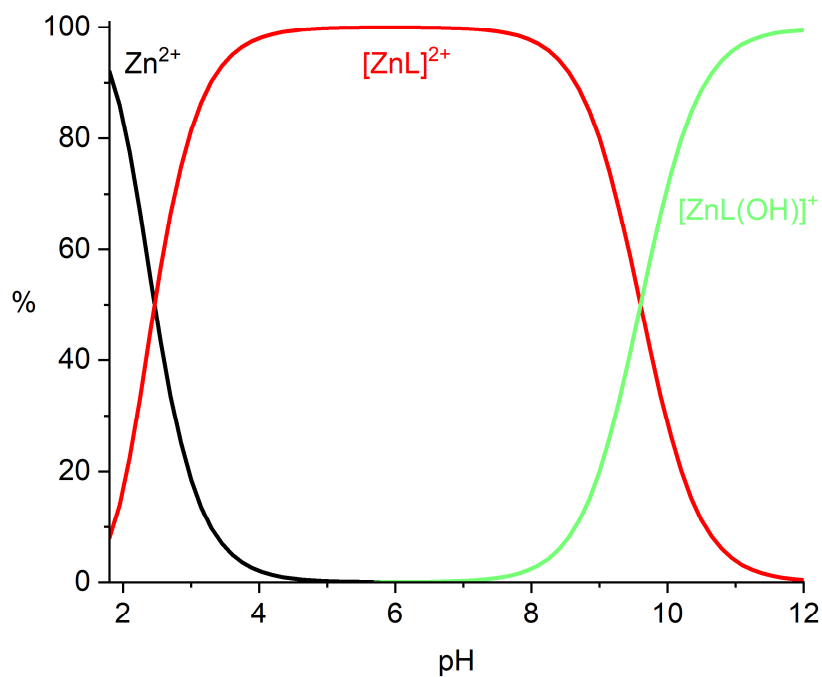

**Figure S31.** Distribution diagram of the Zn<sup>II</sup>-dpph system ( $c_M = c_L = 4$  mM, 25 °C).

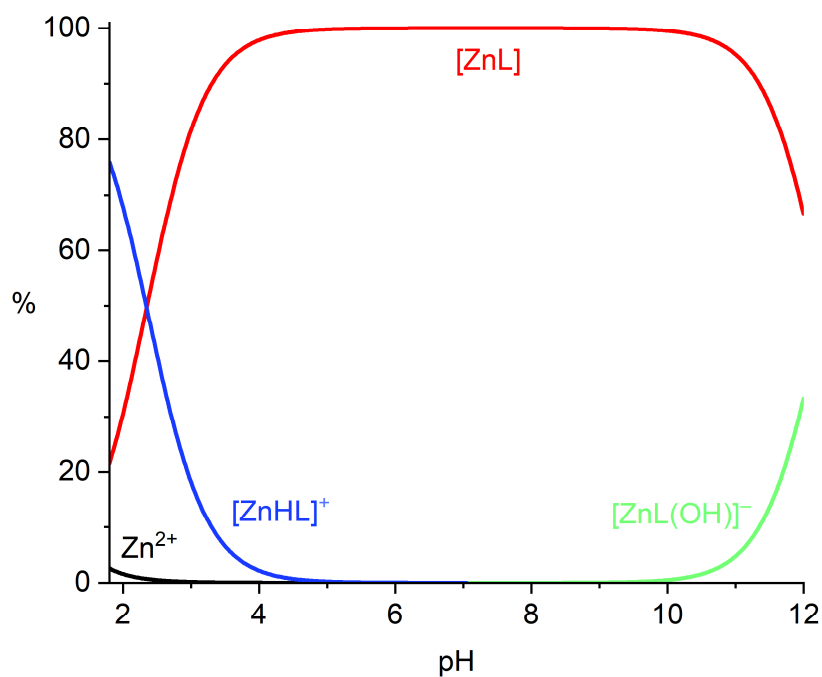

**Figure S32.** Distribution diagram of the  $\text{Zn}^{\text{II}}\text{-H}_2\text{dppa}$  system ( $c_{\text{M}} = c_{\text{L}} = 4 \text{ mM}$ ,  $25 \text{ }^\circ\text{C}$ ).

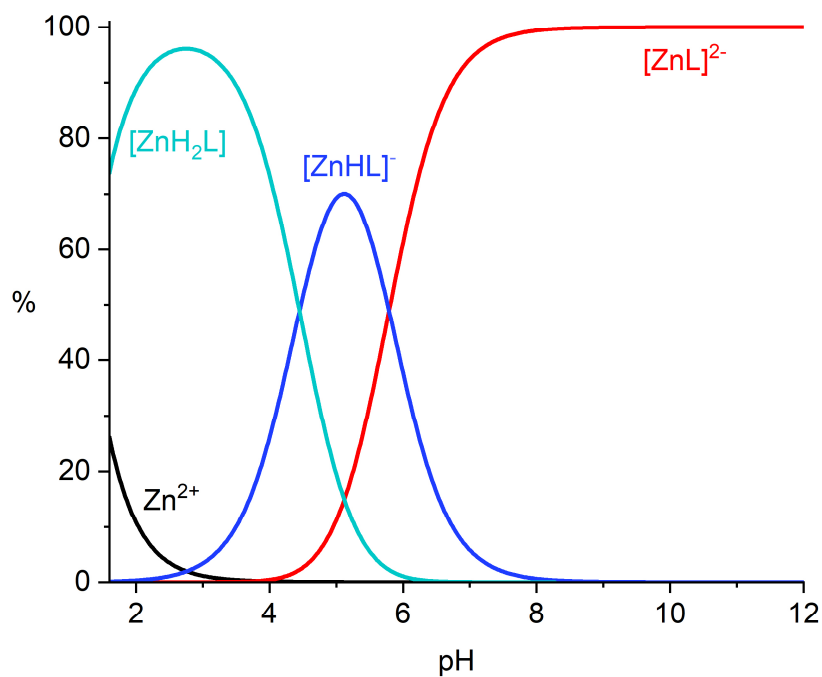

**Figure S33.** Distribution diagram of the  $\text{Zn}^{\text{II}}\text{-H}_4\text{dppp}$  system ( $c_{\text{M}} = c_{\text{L}} = 4 \text{ mM}$ ,  $25 \text{ }^\circ\text{C}$ ).

## Crystallography

**Table S3.** Crystallographic parameters of the studied compounds (Part 1).

| Parameter                                            | (H <sub>4</sub> dppp)·3H <sub>2</sub> O                                      | [Ni(dpph)Cl <sub>2</sub> ]<br>·H <sub>2</sub> O·0.5 <i>i</i> PrOH                   | [Cu(dpph)Cl <sub>2</sub> ]<br>·H <sub>2</sub> O·0.5 <i>i</i> PrOH                   | [Zn(dpph)Cl <sub>2</sub> ]<br>·H <sub>2</sub> O·0.5 <i>i</i> PrOH                    | [Ni(dppa)(H <sub>2</sub> O) <sub>2</sub> ]·2H <sub>2</sub> O    | [Ni(dppa)]·2H <sub>2</sub> O                                    |
|------------------------------------------------------|------------------------------------------------------------------------------|-------------------------------------------------------------------------------------|-------------------------------------------------------------------------------------|--------------------------------------------------------------------------------------|-----------------------------------------------------------------|-----------------------------------------------------------------|
| Formula                                              | C <sub>16</sub> H <sub>28</sub> N <sub>4</sub> O <sub>9</sub> P <sub>2</sub> | C <sub>15.5</sub> H <sub>22</sub> Cl <sub>2</sub> N <sub>4</sub> NiO <sub>1.5</sub> | C <sub>15.5</sub> H <sub>22</sub> Cl <sub>2</sub> CuN <sub>4</sub> O <sub>1.5</sub> | C <sub>15.5</sub> H <sub>22</sub> Cl <sub>2</sub> N <sub>4</sub> O <sub>1.5</sub> Zn | C <sub>18</sub> H <sub>26</sub> N <sub>4</sub> NiO <sub>8</sub> | C <sub>18</sub> H <sub>22</sub> N <sub>4</sub> NiO <sub>6</sub> |
| Colour                                               | colourless                                                                   | light blue                                                                          | light blue                                                                          | colourless                                                                           | light purple                                                    | deep purple                                                     |
| <i>M<sub>r</sub></i>                                 | 482.36                                                                       | 417.98                                                                              | 422.81                                                                              | 424.64                                                                               | 485.14                                                          | 449.10                                                          |
| Crystal system                                       | triclinic                                                                    | orthorhombic                                                                        | orthorhombic                                                                        | orthorhombic                                                                         | monoclinic                                                      | monoclinic                                                      |
| Space group                                          | <i>P</i> -1                                                                  | <i>Fddd</i>                                                                         | <i>Fddd</i>                                                                         | <i>Fddd</i>                                                                          | <i>C2/c</i>                                                     | <i>C2/c</i>                                                     |
| <i>a</i> (Å)                                         | 10.3806(5)                                                                   | 8.5884(5)                                                                           | 8.6379(5)                                                                           | 8.6134(3)                                                                            | 15.8485(5)                                                      | 29.776(1)                                                       |
| <i>b</i> (Å)                                         | 10.5152(5)                                                                   | 28.518(2)                                                                           | 28.721(2)                                                                           | 28.957(1)                                                                            | 14.0168(4)                                                      | 9.663(3)                                                        |
| <i>c</i> (Å)                                         | 10.8179(5)                                                                   | 29.137(2)                                                                           | 28.937(2)                                                                           | 29.024(1)                                                                            | 9.6438(4)                                                       | 13.606(5)                                                       |
| $\alpha$ (°)                                         | 78.849(2)                                                                    | 90                                                                                  | 90                                                                                  | 90                                                                                   | 90                                                              | 90                                                              |
| $\beta$ (°)                                          | 62.627(1)                                                                    | 90                                                                                  | 90                                                                                  | 90                                                                                   | 108.634(1)                                                      | 107.757(1)                                                      |
| $\gamma$ (°)                                         | 77.618(2)                                                                    | 90                                                                                  | 90                                                                                  | 90                                                                                   | 90                                                              | 90                                                              |
| <i>V</i> (Å <sup>3</sup> )                           | 1018.08(8)                                                                   | 7136.4(8)                                                                           | 7178.9(7)                                                                           | 7239.1(5)                                                                            | 2030.0(1)                                                       | 3728.0(2)                                                       |
| <i>Z</i>                                             | 2                                                                            | 16                                                                                  | 16                                                                                  | 16                                                                                   | 4                                                               | 8                                                               |
| <i>D</i> <sub>calc</sub> (g/m <sup>3</sup> )         | 1.574                                                                        | 1.556                                                                               | 1.565                                                                               | 1.558                                                                                | 1.587                                                           | 1.600                                                           |
| $\mu$ (mm <sup>-1</sup> )                            | 0.274                                                                        | 1.400                                                                               | 1.528                                                                               | 1.665                                                                                | 1.011                                                           | 1.087                                                           |
| Total refl.                                          | 5050                                                                         | 2226                                                                                | 2236                                                                                | 2256                                                                                 | 2513                                                            | 4607                                                            |
| Obsd. refl.<br>[ <i>I</i> > 2 $\sigma$ ( <i>I</i> )] | 4753                                                                         | 2175                                                                                | 2139                                                                                | 2117                                                                                 | 2471                                                            | 4514                                                            |
| <i>R</i>                                             | 0.0278                                                                       | 0.0200                                                                              | 0.0208                                                                              | 0.0219                                                                               | 0.0216                                                          | 0.0223                                                          |
| <i>R</i> '<br>[ <i>I</i> > 2 $\sigma$ ( <i>I</i> )]  | 0.0297                                                                       | 0.0204                                                                              | 0.0217                                                                              | 0.0239                                                                               | 0.0220                                                          | 0.0226                                                          |
| <i>wR</i>                                            | 0.0719                                                                       | 0.0527                                                                              | 0.0585                                                                              | 0.0552                                                                               | 0.0529                                                          | 0.0568                                                          |
| <i>wR</i> '<br>[ <i>I</i> > 2 $\sigma$ ( <i>I</i> )] | 0.0731                                                                       | 0.0531                                                                              | 0.0592                                                                              | 0.0564                                                                               | 0.0532                                                          | 0.0570                                                          |
| CCDC ref. no.                                        | 2516505                                                                      | 2516499                                                                             | 2516502                                                                             | 2516500                                                                              | 2516498                                                         | 2516504                                                         |

**Table S3.** Crystallographic parameters of the studied compounds (Part 2).

| Parameter                                    | [Cu( <b>dppa</b> )]·2H <sub>2</sub> O                           | {[Cu(H <sub>2</sub> <b>dppp</b> )] <sub>2</sub> }<br>·10H <sub>2</sub> O·2CH <sub>3</sub> COCH <sub>3</sub> | [Co( <b>dppa</b> )]Cl·4.5H <sub>2</sub> O                           | [Fe( <b>dppa</b> )]Cl·4H <sub>2</sub> O                           | {[Ga( <b>dppa</b> )] <sub>4</sub> }Cl <sub>4</sub> ·17H <sub>2</sub> O                           |
|----------------------------------------------|-----------------------------------------------------------------|-------------------------------------------------------------------------------------------------------------|---------------------------------------------------------------------|-------------------------------------------------------------------|--------------------------------------------------------------------------------------------------|
| Formula                                      | C <sub>18</sub> H <sub>22</sub> CuN <sub>4</sub> O <sub>6</sub> | C <sub>38</sub> H <sub>72</sub> Cu <sub>2</sub> N <sub>8</sub> O <sub>24</sub> P <sub>4</sub>               | C <sub>18</sub> H <sub>27</sub> ClCoN <sub>4</sub> O <sub>8.5</sub> | C <sub>18</sub> H <sub>26</sub> CFelN <sub>4</sub> O <sub>8</sub> | C <sub>72</sub> H <sub>106</sub> Cl <sub>4</sub> Ga <sub>4</sub> N <sub>16</sub> O <sub>33</sub> |
| Colour                                       | green-blue                                                      | green                                                                                                       | orange                                                              | yellow                                                            | white                                                                                            |
| <i>M<sub>r</sub></i>                         | 453.93                                                          | 1275.99                                                                                                     | 529.81                                                              | 517.73                                                            | 2144.40                                                                                          |
| Crystal system                               | monoclinic                                                      | triclinic                                                                                                   | monoclinic                                                          | triclinic                                                         | triclinic                                                                                        |
| Space group                                  | <i>C2/c</i>                                                     | <i>P</i> -1                                                                                                 | <i>P2<sub>1</sub>/c</i>                                             | <i>P</i> -1                                                       | <i>P</i> -1                                                                                      |
| <i>a</i> (Å)                                 | 29.716(1)                                                       | 11.0889(6)                                                                                                  | 9.6618(7)                                                           | 9.059(1)                                                          | 9.5403(5)                                                                                        |
| <i>b</i> (Å)                                 | 9.7356(4)                                                       | 11.3906(6)                                                                                                  | 15.588(1)                                                           | 9.764(1)                                                          | 15.2608(8)                                                                                       |
| <i>c</i> (Å)                                 | 13.7443(6)                                                      | 11.9217(6)                                                                                                  | 14.686(1)                                                           | 14.477(2)                                                         | 15.6879(8)                                                                                       |
| <i>α</i> (°)                                 | 90                                                              | 94.577(2)                                                                                                   | 90                                                                  | 72.604(5)                                                         | 100.388(2)                                                                                       |
| <i>β</i> (°)                                 | 109.119(1)                                                      | 102.408(2)                                                                                                  | 105.502(3)                                                          | 72.489(5)                                                         | 106.769(2)                                                                                       |
| <i>γ</i> (°)                                 | 90                                                              | 110.001(2)                                                                                                  | 90                                                                  | 63.055(5)                                                         | 91.963(2)                                                                                        |
| <i>V</i> (Å <sup>3</sup> )                   | 3756.9(3)                                                       | 1362.5(1)                                                                                                   | 2131.4(3)                                                           | 1068.4(3)                                                         | 2142.0(2)                                                                                        |
| <i>Z</i>                                     | 8                                                               | 1                                                                                                           | 4                                                                   | 2                                                                 | 1                                                                                                |
| <i>D</i> <sub>calc</sub> (g/m <sup>3</sup> ) | 1.605                                                           | 1.555                                                                                                       | 1.651                                                               | 1.609                                                             | 1.662                                                                                            |
| <i>μ</i> (mm <sup>-1</sup> )                 | 1.208                                                           | 0.985                                                                                                       | 0.988                                                               | 0.885                                                             | 1.466                                                                                            |
| Total refl.                                  | 4661                                                            | 6725                                                                                                        | 5293                                                                | 5303                                                              | 10566                                                                                            |
| Obsd. refl.<br>[ <i>I</i> > 2σ( <i>I</i> )]  | 4572                                                            | 6631                                                                                                        | 5056                                                                | 5156                                                              | 9401                                                                                             |
| <i>R</i>                                     | 0.0271                                                          | 0.0228                                                                                                      | 0.0317                                                              | 0.0373                                                            | 0.0294                                                                                           |
| <i>R</i> '<br>[ <i>I</i> > 2σ( <i>I</i> )]   | 0.0275                                                          | 0.0231                                                                                                      | 0.0333                                                              | 0.0382                                                            | 0.0343                                                                                           |
| <i>wR</i>                                    | 0.0716                                                          | 0.0616                                                                                                      | 0.0802                                                              | 0.0886                                                            | 0.0797                                                                                           |
| <i>wR</i> '<br>[ <i>I</i> > 2σ( <i>I</i> )]  | 0.0719                                                          | 0.0618                                                                                                      | 0.0811                                                              | 0.0891                                                            | 0.0828                                                                                           |
| CCDC ref. no.                                | 2516507                                                         | 2516503                                                                                                     | 2516508                                                             | 2516506                                                           | 2516501                                                                                          |

**Table S4.** Bond lengths (Å) and angles (°) of the metal coordination sphere in the solid state.

|                                        | [Ni( <b>dpph</b> )Cl <sub>2</sub> ]<br>·H <sub>2</sub> O·0.5 <i>i</i> PrOH                                  | [Cu( <b>dpph</b> )Cl <sub>2</sub> ]<br>·H <sub>2</sub> O·0.5 <i>i</i> PrOH | [Zn( <b>dpph</b> )Cl <sub>2</sub> ]<br>·H <sub>2</sub> O·0.5 <i>i</i> PrOH                     |
|----------------------------------------|-------------------------------------------------------------------------------------------------------------|----------------------------------------------------------------------------|------------------------------------------------------------------------------------------------|
| M–N1/N1 <sup>#</sup> (py)              | 2.012(1)                                                                                                    | 2.039(1)                                                                   | 2.121(1)                                                                                       |
| M–N4/N10                               | 2.182(1)                                                                                                    | 2.333(1)                                                                   | 2.271(1)                                                                                       |
| M1–Cl                                  | 2.396(1)                                                                                                    | 2.318(1)                                                                   | 2.388(1)                                                                                       |
| N1–M–N1 <sup>#</sup> (py)              | 85.67(6)                                                                                                    | 82.75(6)                                                                   | 81.75(6)                                                                                       |
| N4–M–N4 <sup>#</sup>                   | 152.13(6)                                                                                                   | 147.65(6)                                                                  | 144.61(6)                                                                                      |
| Cl–M–Cl <sup>#</sup>                   | 90.93(2)                                                                                                    | 93.33(2)                                                                   | 92.83(2)                                                                                       |
|                                        | [Ni( <b>dppa</b> )(H <sub>2</sub> O) <sub>2</sub> ]·2H <sub>2</sub> O                                       | [Ni( <b>dppa</b> )]·2H <sub>2</sub> O                                      | [Cu( <b>dppa</b> )]·2H <sub>2</sub> O                                                          |
| M–N1/N1 <sup>#</sup> /N7 (py)          | 2.004(1)                                                                                                    | 1.993(1)/1.999(1)                                                          | 1.982(1)/2.151(1)                                                                              |
| M–N4/N4 <sup>#</sup> /N10              | 2.222(1)                                                                                                    | 2.148(1)/2.128(1)                                                          | 2.364(1)/2.169(1)                                                                              |
| M1–X <sup>a</sup>                      | 2.014(1)                                                                                                    | 2.066(1)/2.043(1)                                                          | 1.943(1)/2.017(1)                                                                              |
| N1–M–N1 <sup>#</sup> /N7 (py)          | 84.58(5)                                                                                                    | 86.74(4)                                                                   | 83.25(5)                                                                                       |
| N4–M–N4 <sup>#</sup> /N10              | 153.88(5)                                                                                                   | 155.53(4)                                                                  | 148.40(4)                                                                                      |
| X–M–X <sup>a</sup>                     | 94.17(6)                                                                                                    | 90.55(3)                                                                   | 92.33(4)                                                                                       |
|                                        | {[Cu(H <sub>2</sub> <b>dppp</b> )] <sub>2</sub> }<br>·10H <sub>2</sub> O·2CH <sub>3</sub> COCH <sub>3</sub> | [Cu(H <sub>2</sub> <b>dppa</b> )Cl <sub>2</sub> ] <sup>c,d</sup>           | [Cu <sub>4</sub> (H <b>dppa</b> ) <sub>4</sub> (ClO <sub>4</sub> ) <sub>4</sub> ] <sup>c</sup> |
| M–N1/N7 (py)                           | 2.005(1)/2.053(1)                                                                                           | 1.98–2.07                                                                  | 1.905/2.191                                                                                    |
| M–N4/N10                               | 2.340(1)/2.339(1)                                                                                           | 2.23–2.40                                                                  | 2.253/2.313                                                                                    |
| M1–X <sup>a</sup>                      | 2.031(1)/1.932(1)                                                                                           | 2.29–2.38                                                                  | 2.191/1.905                                                                                    |
| N1–M–N1 <sup>#</sup> /N7 (py)          | 81.90(4)                                                                                                    | 81–83                                                                      | 82.01                                                                                          |
| N4–M–N4 <sup>#</sup> /N10              | 149.85(4)                                                                                                   | 147–148                                                                    | 147.26                                                                                         |
| X–M–X <sup>a</sup>                     | 93.43(4)                                                                                                    | 94–95                                                                      | 85.69                                                                                          |
|                                        | [Co( <b>dppa</b> )Cl]·4.5H <sub>2</sub> O                                                                   | [Fe( <b>dppa</b> )Cl]·4H <sub>2</sub> O                                    | {[Ga( <b>dppa</b> )] <sub>4</sub> }Cl <sub>4</sub> ·17H <sub>2</sub> O <sup>d</sup>            |
| M–N1/N7 (py)                           | 1.838(1)/1.838(1)                                                                                           | 2.088(2)/2.258(2)                                                          | 2.037(2)/2.108(2)<br>2.033(2)/2.128(2)                                                         |
| M–N4/N10                               | 1.945(1)/1.948(1)                                                                                           | 2.315(2)/2.311(2)                                                          | 2.244(2)/2.311(1)<br>2.323(2)/2.235(2)                                                         |
| M1–O <sup>b</sup>                      | 1.896(1)/1.920(1)                                                                                           | 2.079(1)/2.093(1)                                                          | 2.030(1)/2.121(1)<br>1.954(1)/2.400(1)                                                         |
| N1–M–N1/N7 (py)                        | 93.51(6)                                                                                                    | 77.35(6)                                                                   | 84.81(6)<br>82.02(6)                                                                           |
| N4–M–N4/N10                            | 167.95(6)                                                                                                   | 138.85(6)                                                                  | 143.09(6)<br>145.42(5)                                                                         |
| O–M–O <sup>b</sup>                     | 89.62(5)                                                                                                    | 72.79(5)                                                                   | 73.13(5)<br>89.26(5)                                                                           |
| Fe–Cl <sup>e</sup> / Ga–O <sup>f</sup> | –                                                                                                           | 2.286(1) <sup>e</sup>                                                      | 1.972(1) <sup>f</sup><br>1.927(1) <sup>f</sup>                                                 |

<sup>a</sup> X = Cl or H<sub>2</sub>O or pendant arm oxygen atom; <sup>b</sup> O = pendant arm oxygen atom; <sup>c</sup> Ref. 4; <sup>d</sup> Two independent complex molecules; <sup>e</sup> Coordinated chloride ion; <sup>f</sup> Pendant oxygen atom of the neighbouring complex molecule.

## References

---

- <sup>1</sup> A. Jouaiti and M. W. Hosseini, *Helv. Chim. Acta*, 2009, **92**, 2497.
- <sup>2</sup> Y.-J. Liu, Y.-Z. Han, Y.-Z. Zhang, W. Zhang, W.-Z. Lai and Y. Wang, *Chem. Commun.*, 2017, **53**, 3189.
- <sup>3</sup> A. J. Wessel, J. W. Schultz, F. Tang, H. Duan and L. M. Mirica, *Org. Biomol. Chem.*, 2017, **15**, 9923.
- <sup>4</sup> A. K. Sharma, J. W. Schultz, J. T. Prior, N. P. Rath and L. M. Mirica, *Inorg. Chem.*, 2017, **56**, 13801.
